# Supplementary material for: Duration of dual antiplatelet therapy after drug-eluting stent implantation: Meta-analysis of large randomised controlled trials
Source: PubMed Central journal article supplement (PMC4538605; doi:10.1038/srep13204), 2015-08-17

Supplementary Information for Duration of dual antiplatelet therapy after drug-eluting stent  
implantation: Meta-analysis of large randomised controlled trials

Title of manuscript:

Duration of dual antiplatelet therapy after drug-eluting stent implantation: Meta-analysis of  
large randomised controlled trials

Man-Fung Tsoi<sup>1</sup>, Ching-Lung Cheung<sup>1,2,3,4,5</sup>, Tommy Tsang Cheung<sup>1,3</sup>, Ian Chi-Kei  
Wong<sup>2,3,4</sup>, Cyrus Rustam Kumana<sup>1,7</sup>, Hung-Fat Tse<sup>3,6,7</sup>, Bernard Man-Yung Cheung<sup>1,3,4,7</sup>

<sup>1</sup>Division of Clinical Pharmacology and Therapeutics, Department of Medicine

<sup>2</sup>Department of Pharmacology and Pharmacy

<sup>3</sup>Research Centre of Heart, Brain, Hormone and Healthy Aging

<sup>4</sup>Partner State Key Laboratory of Pharmaceutical Biotechnology

<sup>5</sup>Centre for Genomic Sciences

<sup>6</sup>Division of Cardiology, Department of Medicine

<sup>7</sup>Institute of Cardiovascular Science and Medicine

The University of Hong Kong, Pokfulam, Hong Kong, China

## Table of Content

| Content                                                                                                                                                                                                                                           | Page |
|---------------------------------------------------------------------------------------------------------------------------------------------------------------------------------------------------------------------------------------------------|------|
| Supplementary Table S1. Summary for blinding, randomization and placebo control of studies included in meta-analysis                                                                                                                              | 2-3  |
| Supplementary Table S2. Risk of Bias Reporting                                                                                                                                                                                                    | 4    |
| Supplementary Table S3. Sensitivity analysis of the effect of prolonging the duration of dual antiplatelet therapy to more than 12 months on frequency of myocardial infarction in patients after drug-eluting stent implantation                 | 5    |
| Supplementary Table S4. Sensitivity analysis of the effect of prolonging the duration of dual antiplatelet therapy to more than 12 months on frequency of definite or probable stent thrombosis in patients after drug-eluting stent implantation | 6    |
| Supplementary Table S5. Sensitivity analysis of meta-analysis the effect of prolonging the duration of dual antiplatelet therapy to more than 12 months on cardiac death rate in patients after drug-eluting stent implantation                   | 7    |
| Supplementary Table S6. Analysis of funnel plots in supplementary figures S2A to S7B to assess publication bias                                                                                                                                   | 8    |
| Captions to supplementary figures                                                                                                                                                                                                                 | 9-10 |

Supplementary table S1. Summary for blinding, randomization and placebo control of studies included in meta-analysis.

| Study                            | Blinding       | Randomization assignment                                                                                                                                                                                                                                                                                                                                                                                                                    | Presence of Placebo  | Time of randomization with respect to index DES procedure                                                                       |
|----------------------------------|----------------|---------------------------------------------------------------------------------------------------------------------------------------------------------------------------------------------------------------------------------------------------------------------------------------------------------------------------------------------------------------------------------------------------------------------------------------------|----------------------|---------------------------------------------------------------------------------------------------------------------------------|
| RESET <sup>4</sup>               | Open-labelled  | Assignments were made by an IWRS into ratio of 1:1 based on randomization scheme and stratified by study sites and clinical or lesion characteristics                                                                                                                                                                                                                                                                                       | No placebo control   | Before DES implantation                                                                                                         |
| EXCELLENT <sup>3</sup>           | Open-labelled  | Assignments were made by a Web-based response system.                                                                                                                                                                                                                                                                                                                                                                                       | No placebo control   | Before DES implantation                                                                                                         |
| PRODIGY <sup>5</sup>             | Open-labelled  | Both randomizations for type of stent implantation and DAPT duration were carried out with a computer-generated sequence produced in coordinating center with random block size of 4, 8 and 12.<br><br>Stent Randomization<br>Assignments were made according to randomization scheme into 1:1:1:1 ratio as stratified by study site.<br><br>Randomization of DAPT duration:<br>Assignments were made via a sealed envelope into 1:1 ratio. | No placebo control   | Stent randomization:<br>Before DES implantation<br><br>Randomization of DAPT duration:<br>30 +/- 5 days after DES implantation. |
| OPTIMIZE <sup>6</sup>            | Open-labelled  | Assignments were made by a dedicated web-based system in blocks into 1:1 ratio and stratified by study sites.                                                                                                                                                                                                                                                                                                                               | No placebo control   | Before DES implantation                                                                                                         |
| DES-LATE <sup>10</sup>           | Open-labelled  | Assignments were made according to a pre-established, computer generated scheme based on site and type of drug eluting stent.                                                                                                                                                                                                                                                                                                               | No placebo control   | 12-18 months after DES implantation                                                                                             |
| ARCTIC-Interruption <sup>7</sup> | Open-labelled  | Assignments were made by an IVRS into ratio 1:1 ratio and stratified by study site.                                                                                                                                                                                                                                                                                                                                                         | No placebo control   | 1 year after DES implantation                                                                                                   |
| SECURITY <sup>8</sup>            | Open-labelled  | Assignments were made by electronic case report form into ratio of 1:1 and stratified by study site in block of 4.                                                                                                                                                                                                                                                                                                                          | No placebo control   | Within 1 day after DES implantation                                                                                             |
| ISAR-SAFE <sup>12</sup>          | Double-blinded | Not reported                                                                                                                                                                                                                                                                                                                                                                                                                                | With placebo control | 6 months after DES implantation                                                                                                 |
| ITALIC <sup>9</sup>              | Open-labelled  | Centralized assignments were made by an IWRS into ratio of 1:1.                                                                                                                                                                                                                                                                                                                                                                             | No placebo control   | 6 months after DES implantation                                                                                                 |

DAPT<sup>11</sup>                      Double-blinded      Assignment was made by central IVRS except use of their own IVRS      With placebo control      360 +/- 30 days after DES implantation  
in Boston Scientific Liberte Study. Randomizations were stratified by  
study site, type of stent implanted (bare metal stent vs. DES),

---

Abbreviations used in Supplementary table S1, DAPT: Dual Anti-platelet therapy; DES: Drug-eluting stent; IVRS: Interactive Voice Response System; IWRS: Interactive web-based system

Supplementary table S2. Risk of Bias Reporting.

| Study                                                  | Sequence generation | Allocation concealment | Blinding of participants<br>and personnel | Blinding of outcome | Incomplete outcome data | Free from other bias |
|--------------------------------------------------------|---------------------|------------------------|-------------------------------------------|---------------------|-------------------------|----------------------|
| Group I. >12 months treatment vs 12 months treatment   |                     |                        |                                           |                     |                         |                      |
| ARCTIC-Interruption 2014 <sup>7</sup>                  | Low                 | Low                    | Unclear                                   | Low                 | Low                     | Low                  |
| DAPT 2014 <sup>11</sup>                                | Low                 | Low                    | Low                                       | Low                 | Low                     | Low                  |
| DES-LATE 2014 <sup>10</sup>                            | Low                 | Low                    | Unclear                                   | Low                 | Low                     | Low                  |
| Group II. >12 months treatment vs <12 months treatment |                     |                        |                                           |                     |                         |                      |
| PRODIGY 2012 <sup>5</sup>                              | Low                 | Low                    | Unclear                                   | Low                 | Low                     | Low                  |
| Group III. 12 months treatment vs <12 months treatment |                     |                        |                                           |                     |                         |                      |
| EXCELLENT 2012 <sup>3</sup>                            | Low                 | Low                    | Unclear                                   | Low                 | Low                     | Low                  |
| RESET 2012 <sup>4</sup>                                | Low                 | Low                    | Unclear                                   | Low                 | Low                     | Low                  |
| OPTIMIZE 2013 <sup>6</sup>                             | Low                 | Unclear                | Unclear                                   | Low                 | Low                     | Low                  |
| ISAR-SAFE 2014 <sup>12</sup>                           | Low                 | Unclear                | Low                                       | Low                 | Low                     | Low                  |
| ITALIC 2014 <sup>9</sup>                               | Low                 | Low                    | Low                                       | Low                 | Low                     | Low                  |
| SECURITY 2014 <sup>8</sup>                             | Low                 | Low                    | Unclear                                   | Low                 | Low                     | Low                  |

Each domain of risk was assigned “Low” for low risk, “Unclear” for unclear risk and “High” for high risk

Supplementary Table S3. Sensitivity analysis of the effect of prolonging the duration of dual antiplatelet therapy to more than 12 months on frequency of myocardial infarction in patients after drug-eluting stent implantation.

| Study                    | Before removing study |       |                |                  |      | After removing study |         |                |                  |      |
|--------------------------|-----------------------|-------|----------------|------------------|------|----------------------|---------|----------------|------------------|------|
|                          | OR                    | p     | I <sup>2</sup> | Chi <sup>2</sup> | P    | OR                   | p       | I <sup>2</sup> | Chi <sup>2</sup> | P    |
| ARCTIC-Interruption 2014 | 0.58                  | 0.004 | 35%            | 3.10             | 0.21 | 0.52                 | <0.0001 | 22%            | 1.28             | 0.26 |
| DAPT 2014                | 0.58                  | 0.004 | 35%            | 3.10             | 0.21 | 0.77                 | 0.30    | 0%             | 0.37             | 0.54 |
| DES-LATE 2014            | 0.58                  | 0.004 | 35%            | 3.10             | 0.21 | 0.59                 | 0.11    | 52%            | 2.11             | 0.15 |

Supplementary Table S4. Sensitivity analysis of the effect of prolonging the duration of dual antiplatelet therapy to more than 12 months on frequency of definite or probable stent thrombosis in patients after drug-eluting stent implantation

| Study                    | Before removing study |        |                |                  |      | After removing study |          |                |                  |      |
|--------------------------|-----------------------|--------|----------------|------------------|------|----------------------|----------|----------------|------------------|------|
|                          | OR                    | p      | I <sup>2</sup> | Chi <sup>2</sup> | P    | OR                   | p        | I <sup>2</sup> | Chi <sup>2</sup> | P    |
| ARCTIC-Interruption 2014 | 0.35                  | 0.0003 | 18%            | 2.44             | 0.30 | 0.38                 | 0.01     | 52             | 2.09             | 0.15 |
| DAPT 2014                | 0.35                  | 0.0003 | 18%            | 2.44             | 0.30 | 0.55                 | 0.19     | 0              | 0.92             | 0.34 |
| DES-LATE 2014            | 0.35                  | 0.0003 | 18%            | 2.44             | 0.30 | 0.28                 | <0.00001 | 0              | 0.22             | 0.64 |

Supplementary Table S5. Sensitivity analysis of the effect of prolonging the duration of dual antiplatelet therapy to more than 12 months on cardiac death rate in patients after drug-eluting stent implantation

| Study         | Before removing study |      |                |                  |      | After removing study |      |                |                  |   |
|---------------|-----------------------|------|----------------|------------------|------|----------------------|------|----------------|------------------|---|
|               | OR                    | p    | I <sup>2</sup> | Chi <sup>2</sup> | P    | OR                   | p    | I <sup>2</sup> | Chi <sup>2</sup> | P |
| DAPT 2014     | 1.12                  | 0.61 | 33%            | 1.48             | 0.22 | 1.47                 | 0.20 |                |                  |   |
| DES-LATE 2014 | 1.12                  | 0.61 | 33%            | 1.48             | 0.22 | 0.94                 | 0.77 |                |                  |   |
|               |                       |      |                |                  |      |                      |      |                | Not Applicable   |   |



Supplementary Table S7. Analysis of funnel plots in supplementary figures 2 to 6 to assess publication bias.

| Suppl.<br>Figure | Begg's rank correlation test         |         | Egger's regression intercept |                                                    | Trim and fill      |                                                   |
|------------------|--------------------------------------|---------|------------------------------|----------------------------------------------------|--------------------|---------------------------------------------------|
|                  | $\tau$ without continuity correction | p-value | p-value                      | Before trimming<br>Observed Point estimate (LL-UL) | Trimming direction | After trimming<br>Adjusted Point estimate (LL-UL) |
| S2A              | 1.000                                | 0.117   | 0.00971                      | 0.583 (0.404-0.840)                                | Left               | 0.482 (0.338-0.687)                               |
| S2B              | 0.143                                | 0.652   | 0.924                        | 0.886 (0.693-1.13)                                 | Not Applicable     | 0.886 (0.693-1.13)                                |
| S3A              | 0.333                                | 0.602   | 0.941                        | 0.350 (0.198-0.620)                                | Right              | 0.343 (0.221-0.533)                               |
| S3B              | -0.238                               | 0.453   | 0.291                        | 0.833 (0.531-1.31)                                 | Not Applicable     | 0.833 (0.531-1.31)                                |
| S4A              | 1.000                                | 0.117   | 0.095                        | 0.928 (0.658-1.31)                                 | Left               | 0.846 (0.632-1.13)                                |
| S4B              | 0.048                                | 0.881   | 0.958                        | 1.13 (0.733-1.76)                                  | Not Applicable     | 1.13 (0.733-1.76)                                 |
| S5A              |                                      |         |                              | Not Applicable*                                    |                    |                                                   |
| S5B              | 0.067                                | 0.851   | 0.931                        | 1.01 (0.737-1.38)                                  | Not Applicable     | 1.01 (0.737-1.38)                                 |
| S6A              | -0.333                               | 0.602   | 0.510                        | 1.31 (1.03-1.68)                                   | Right              | 1.36 (1.07-1.73)                                  |
| S6B              | 0.429                                | 0.176   | 0.159                        | 1.05 (0.851-1.36)                                  | Left               | 1.06 (0.839-1.33)                                 |
| S7A              | 0.333                                | 0.602   | 0.475                        | 1.60 (1.22-2.11)                                   | Left               | 1.54 (1.04-2.28)                                  |
| S7B              | 0.429                                | 0.176   | 0.204                        | 1.92 (1.21-3.04)                                   | Left               | 1.78 (1.15-2.75)                                  |

Abbreviations used in Supplementary table 5: LL: Lower limit; Suppl. Figure: Supplementary Figure; UL: Upper limit

\*Assessment of publication bias for meta-analysis of prolonged dual antiplatelet therapy on cardiac death rate in patients after drug-eluting stent implantation could not be conducted due to number of studies was less than 3.

## Captions to Supplementary figures

Supplementary figure S1. Flow diagram of scientific literature search and study selection

Supplementary Figure S2A. Funnel plot showing publication bias for the effect of prolonging the duration of dual antiplatelet therapy to more than 12 months on frequency of myocardial infarction in patients after drug-eluting stent implantation

Supplementary Figure S2B. Funnel plot showing publication bias for the effect of shortening the duration of dual antiplatelet therapy to less than 12 months on frequency of myocardial infarction in patients after drug-eluting stent implantation

Supplementary Figure S3A. Funnel plot showing publication bias for the effect of prolonging the duration of dual antiplatelet therapy to more than 12 months on frequency of definite or probable stent thrombosis in patients after drug-eluting stent implantation

Supplementary Figure S3B. Funnel plot showing publication bias for the effect of shortening the duration of dual antiplatelet therapy to less than 12 months on frequency of definite or probable stent thrombosis in patients after drug-eluting stent implantation

Supplementary Figure S4A. Funnel plot showing publication bias for the effect of prolonging the duration of dual antiplatelet therapy to more than 12 months on frequency of stroke in patients after drug-eluting stent implantation

Supplementary Figure S4B. Funnel plot showing publication bias for the effect of shortening the duration of dual antiplatelet therapy to less than 12 months on frequency of stroke in patients after drug-eluting stent implantation

Supplementary Figure S5A. Funnel plot showing publication bias for the effect of prolonging the duration of dual antiplatelet therapy to more than 12 months on cardiac death rate in patients after drug-eluting stent implantation

Supplementary Figure S5B. Funnel plot showing publication bias for the effect of shortening the duration of dual antiplatelet therapy to less than 12 months on cardiac death rate in patients after drug-eluting stent implantation

Supplementary Figure S6A. Funnel plot showing publication bias for the effect of prolonging the duration of dual antiplatelet therapy to more than 12 months on all-cause mortality rate in patients after drug-eluting stent implantation

Supplementary Figure S6B. Funnel plot showing publication bias for the effect of shortening the duration of dual antiplatelet therapy to less than 12 months on all-cause mortality rate in patients after drug-eluting stent implantation

Supplementary Figure S7A. Funnel plot showing publication bias for the effect of prolonging the duration of dual antiplatelet therapy to more than 12 months on frequency of major bleeding in patients after drug-eluting stent implantation

Supplementary Figure S7B. Funnel plot showing publication bias for the effect of shortening the duration of dual antiplatelet therapy to less than 12 months on frequency of major bleeding in patients after drug-eluting stent implantation

Total 3273 articles and abstract identified

1275 duplicate articles

1998 articles and abstract

1981 excluded:  
Irrelevant, non-randomized  
controlled trial, case report

17 studies reviewed

7 excluded:  
Not fulfill inclusion criteria

10 studies included in meta-analysis

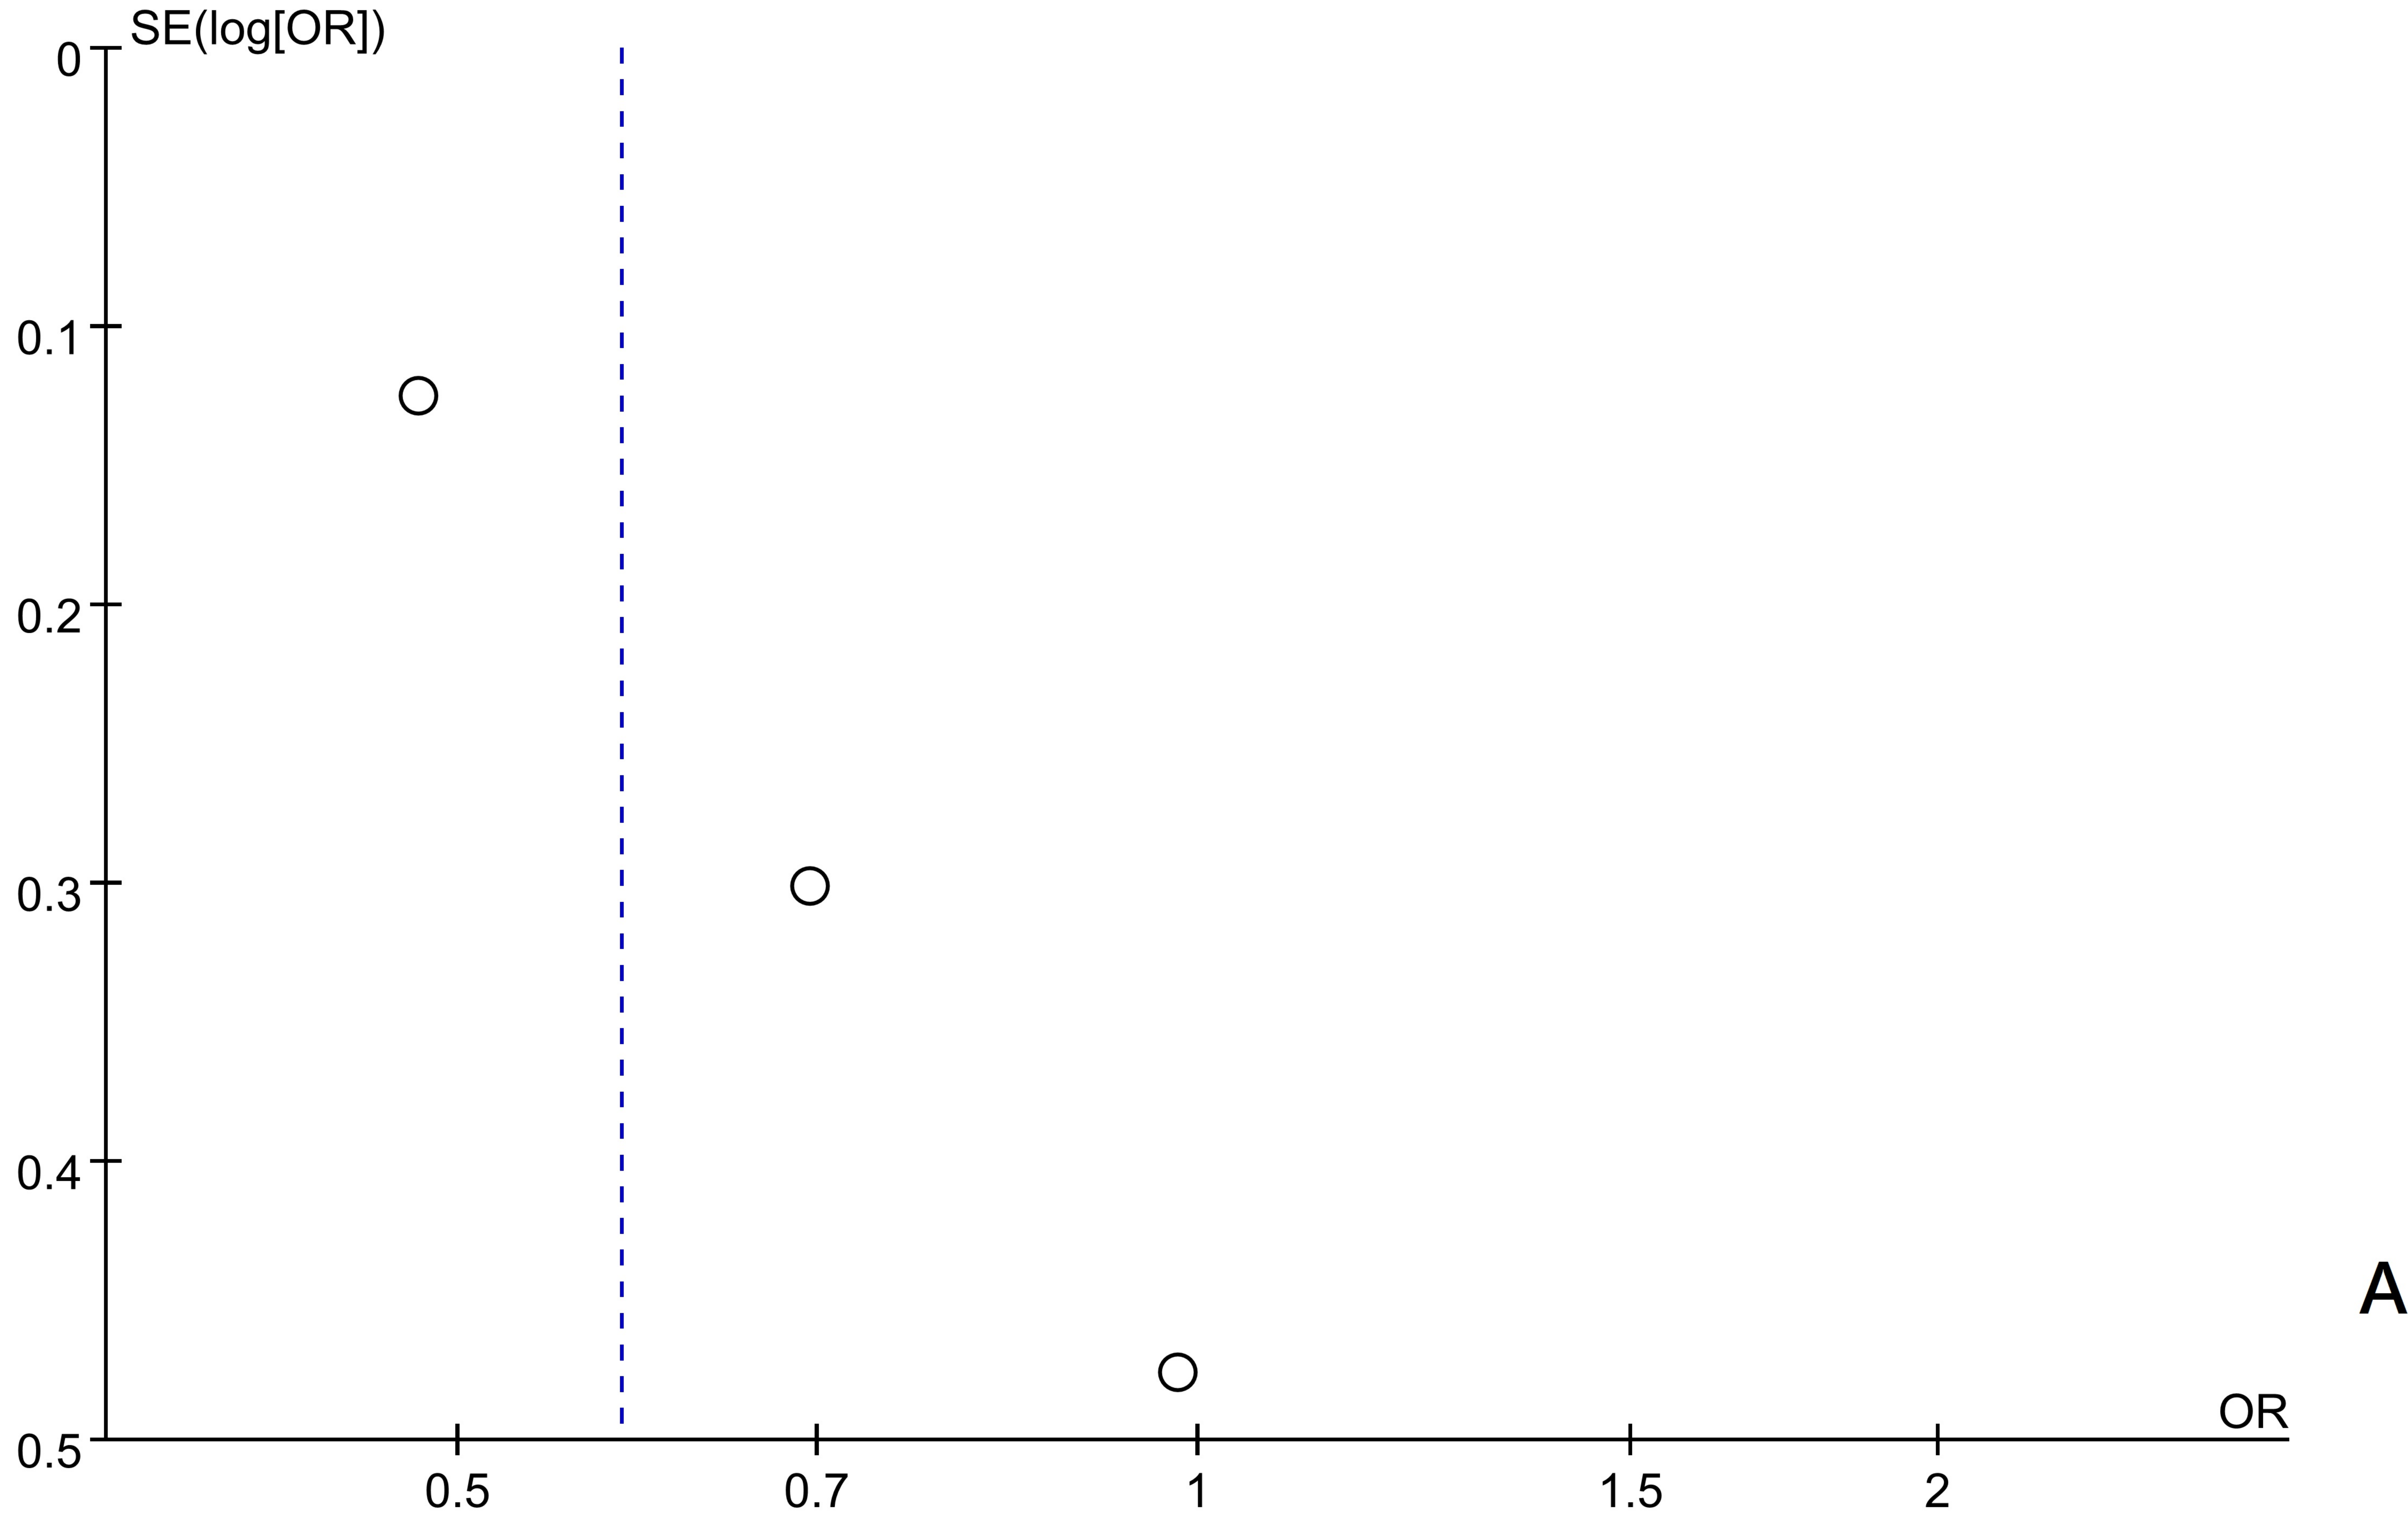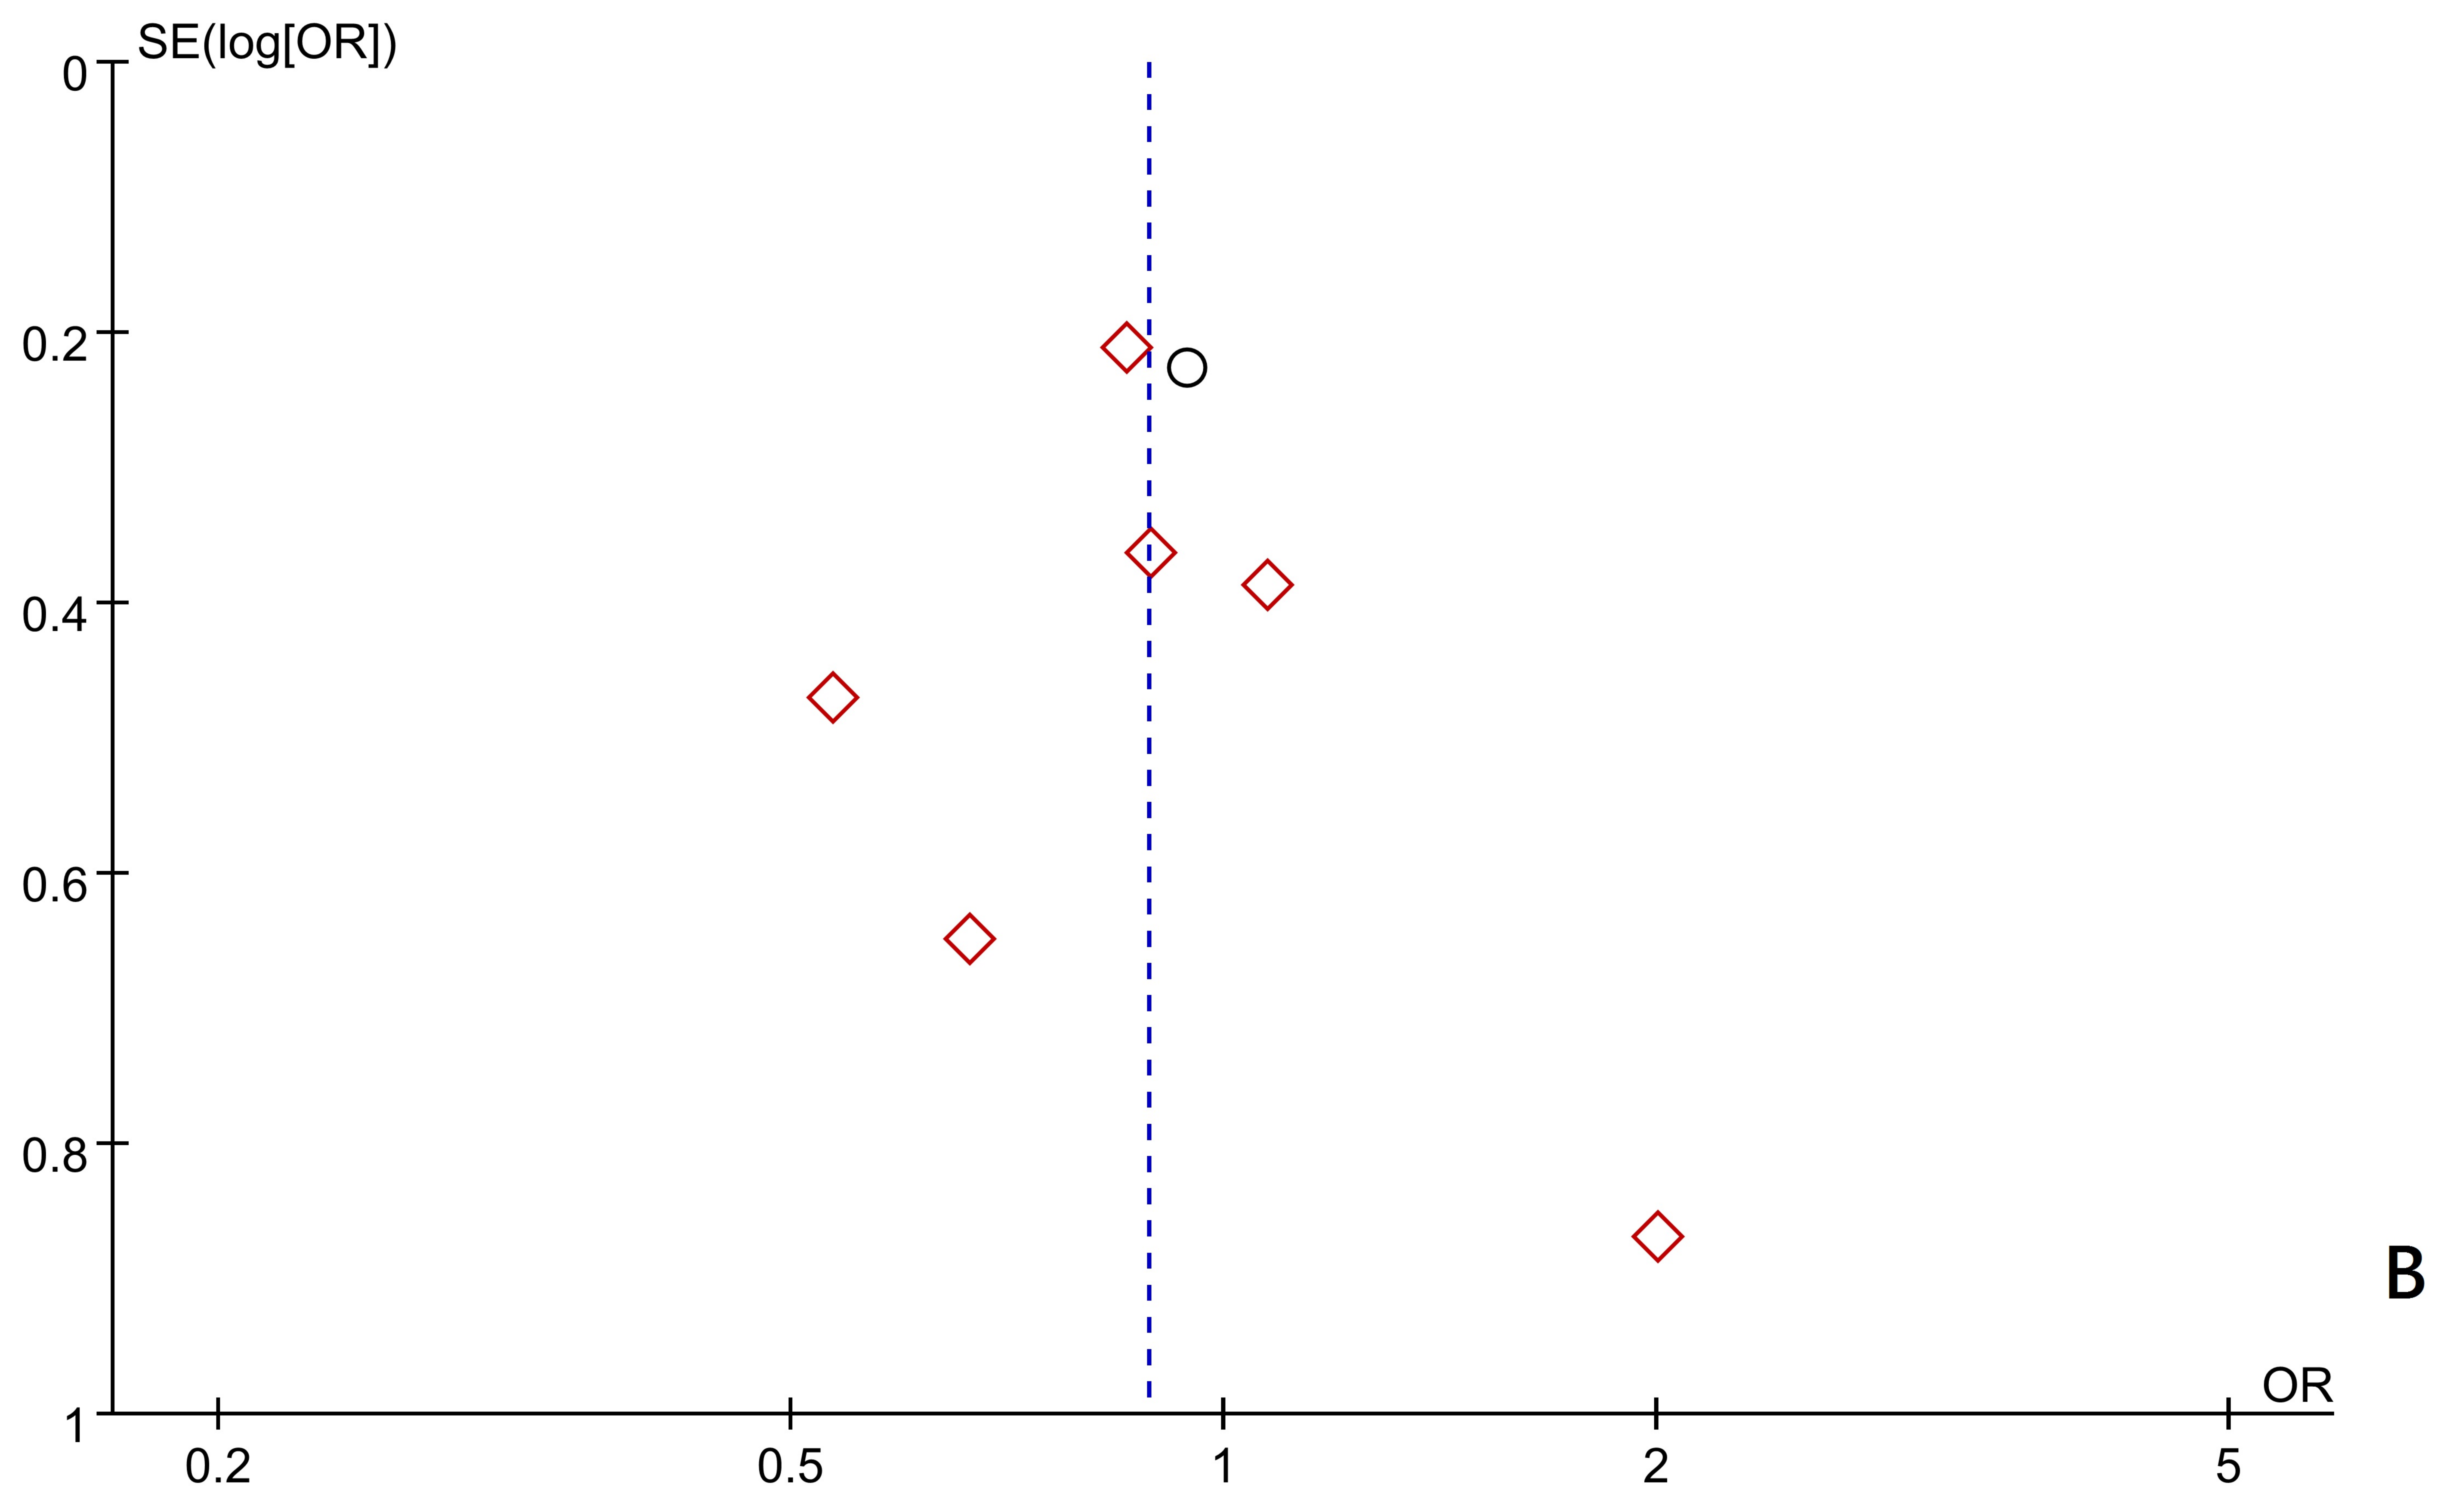

**Subgroups**

- >12 months DAPT treatment vs. <12 months DAPT treatment
- ◇ 12 months DAPT treatment vs. <12 months DAPT treatment



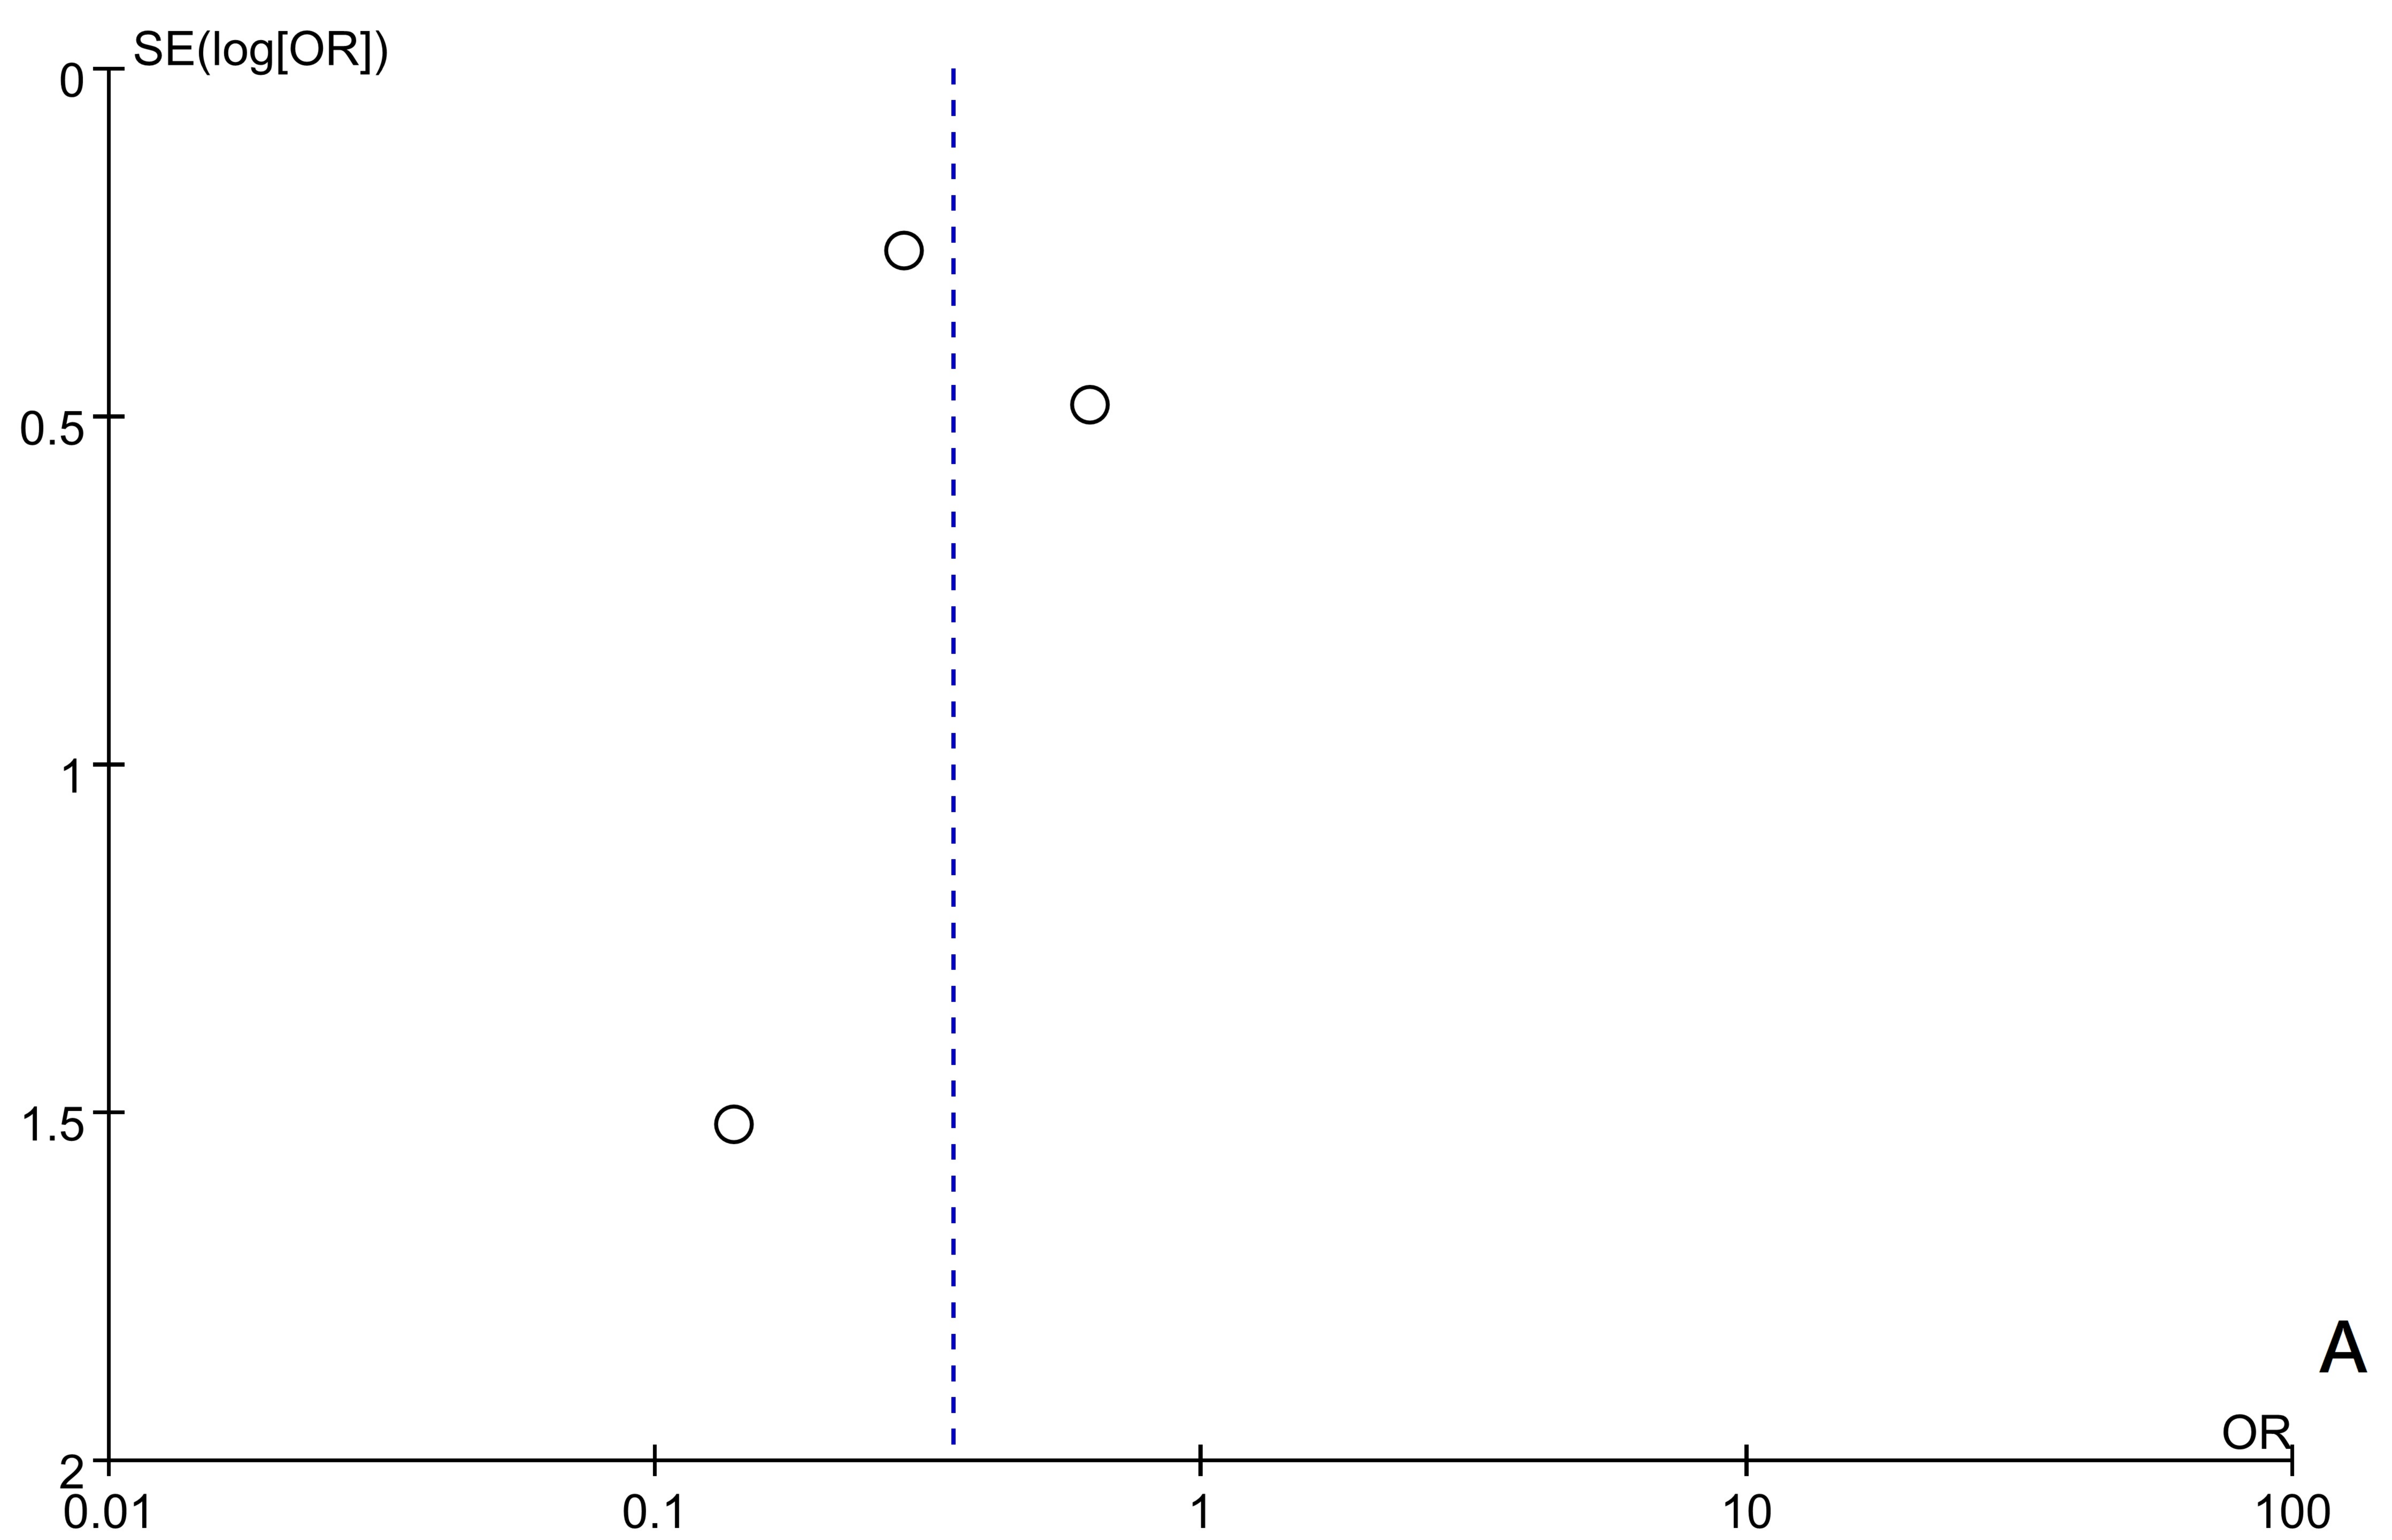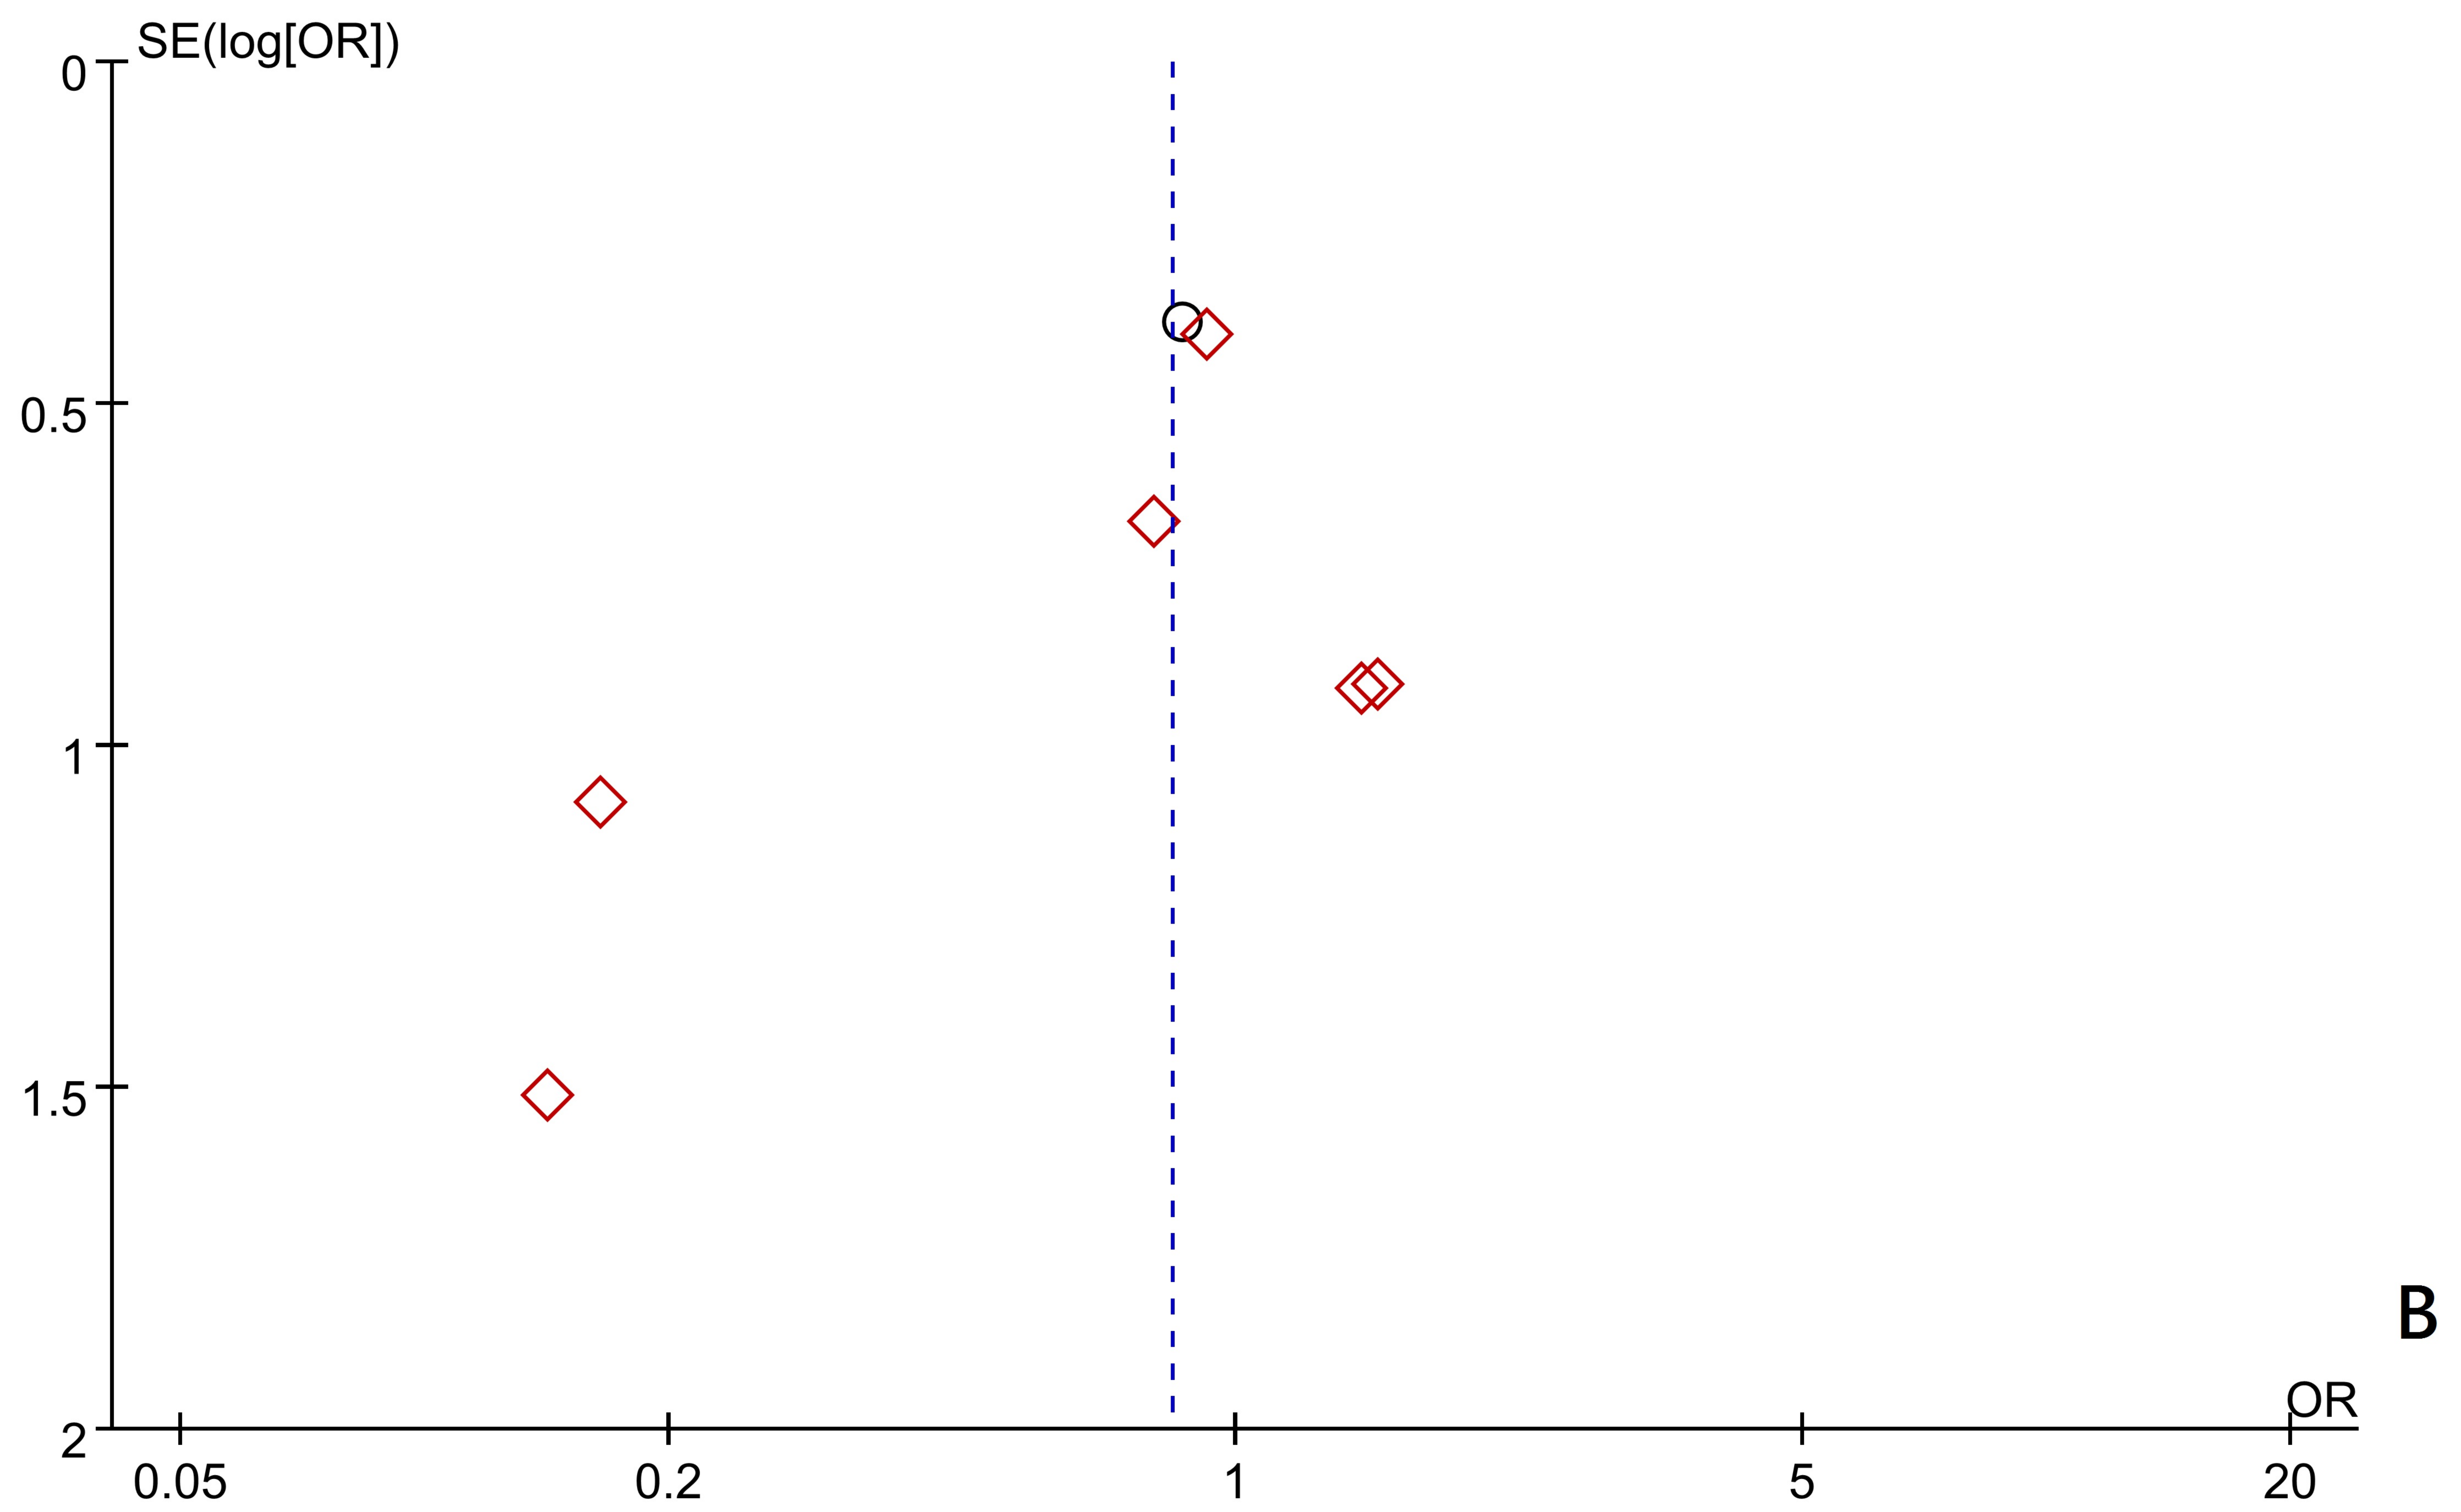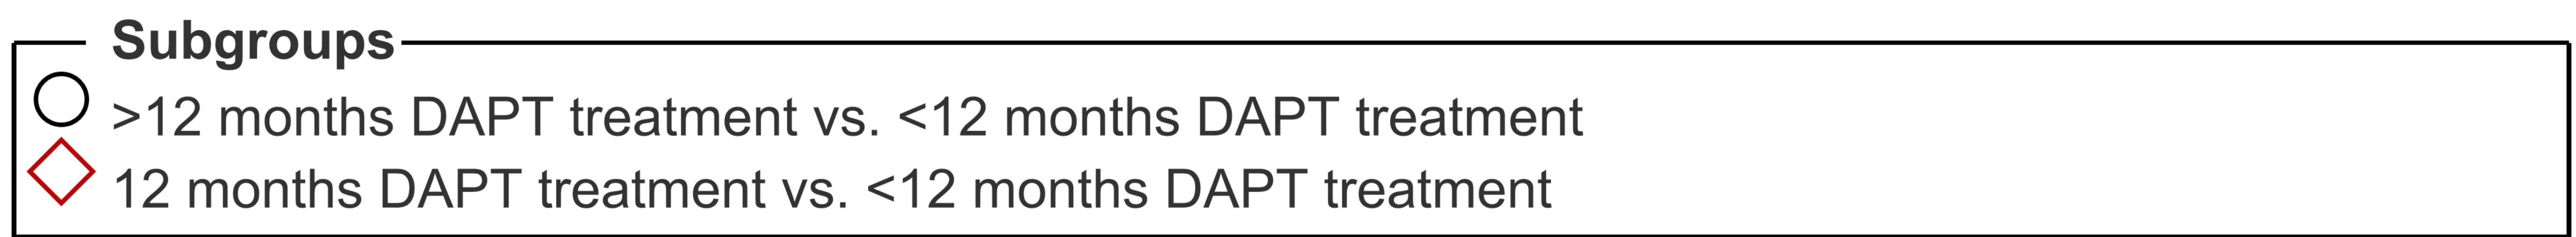

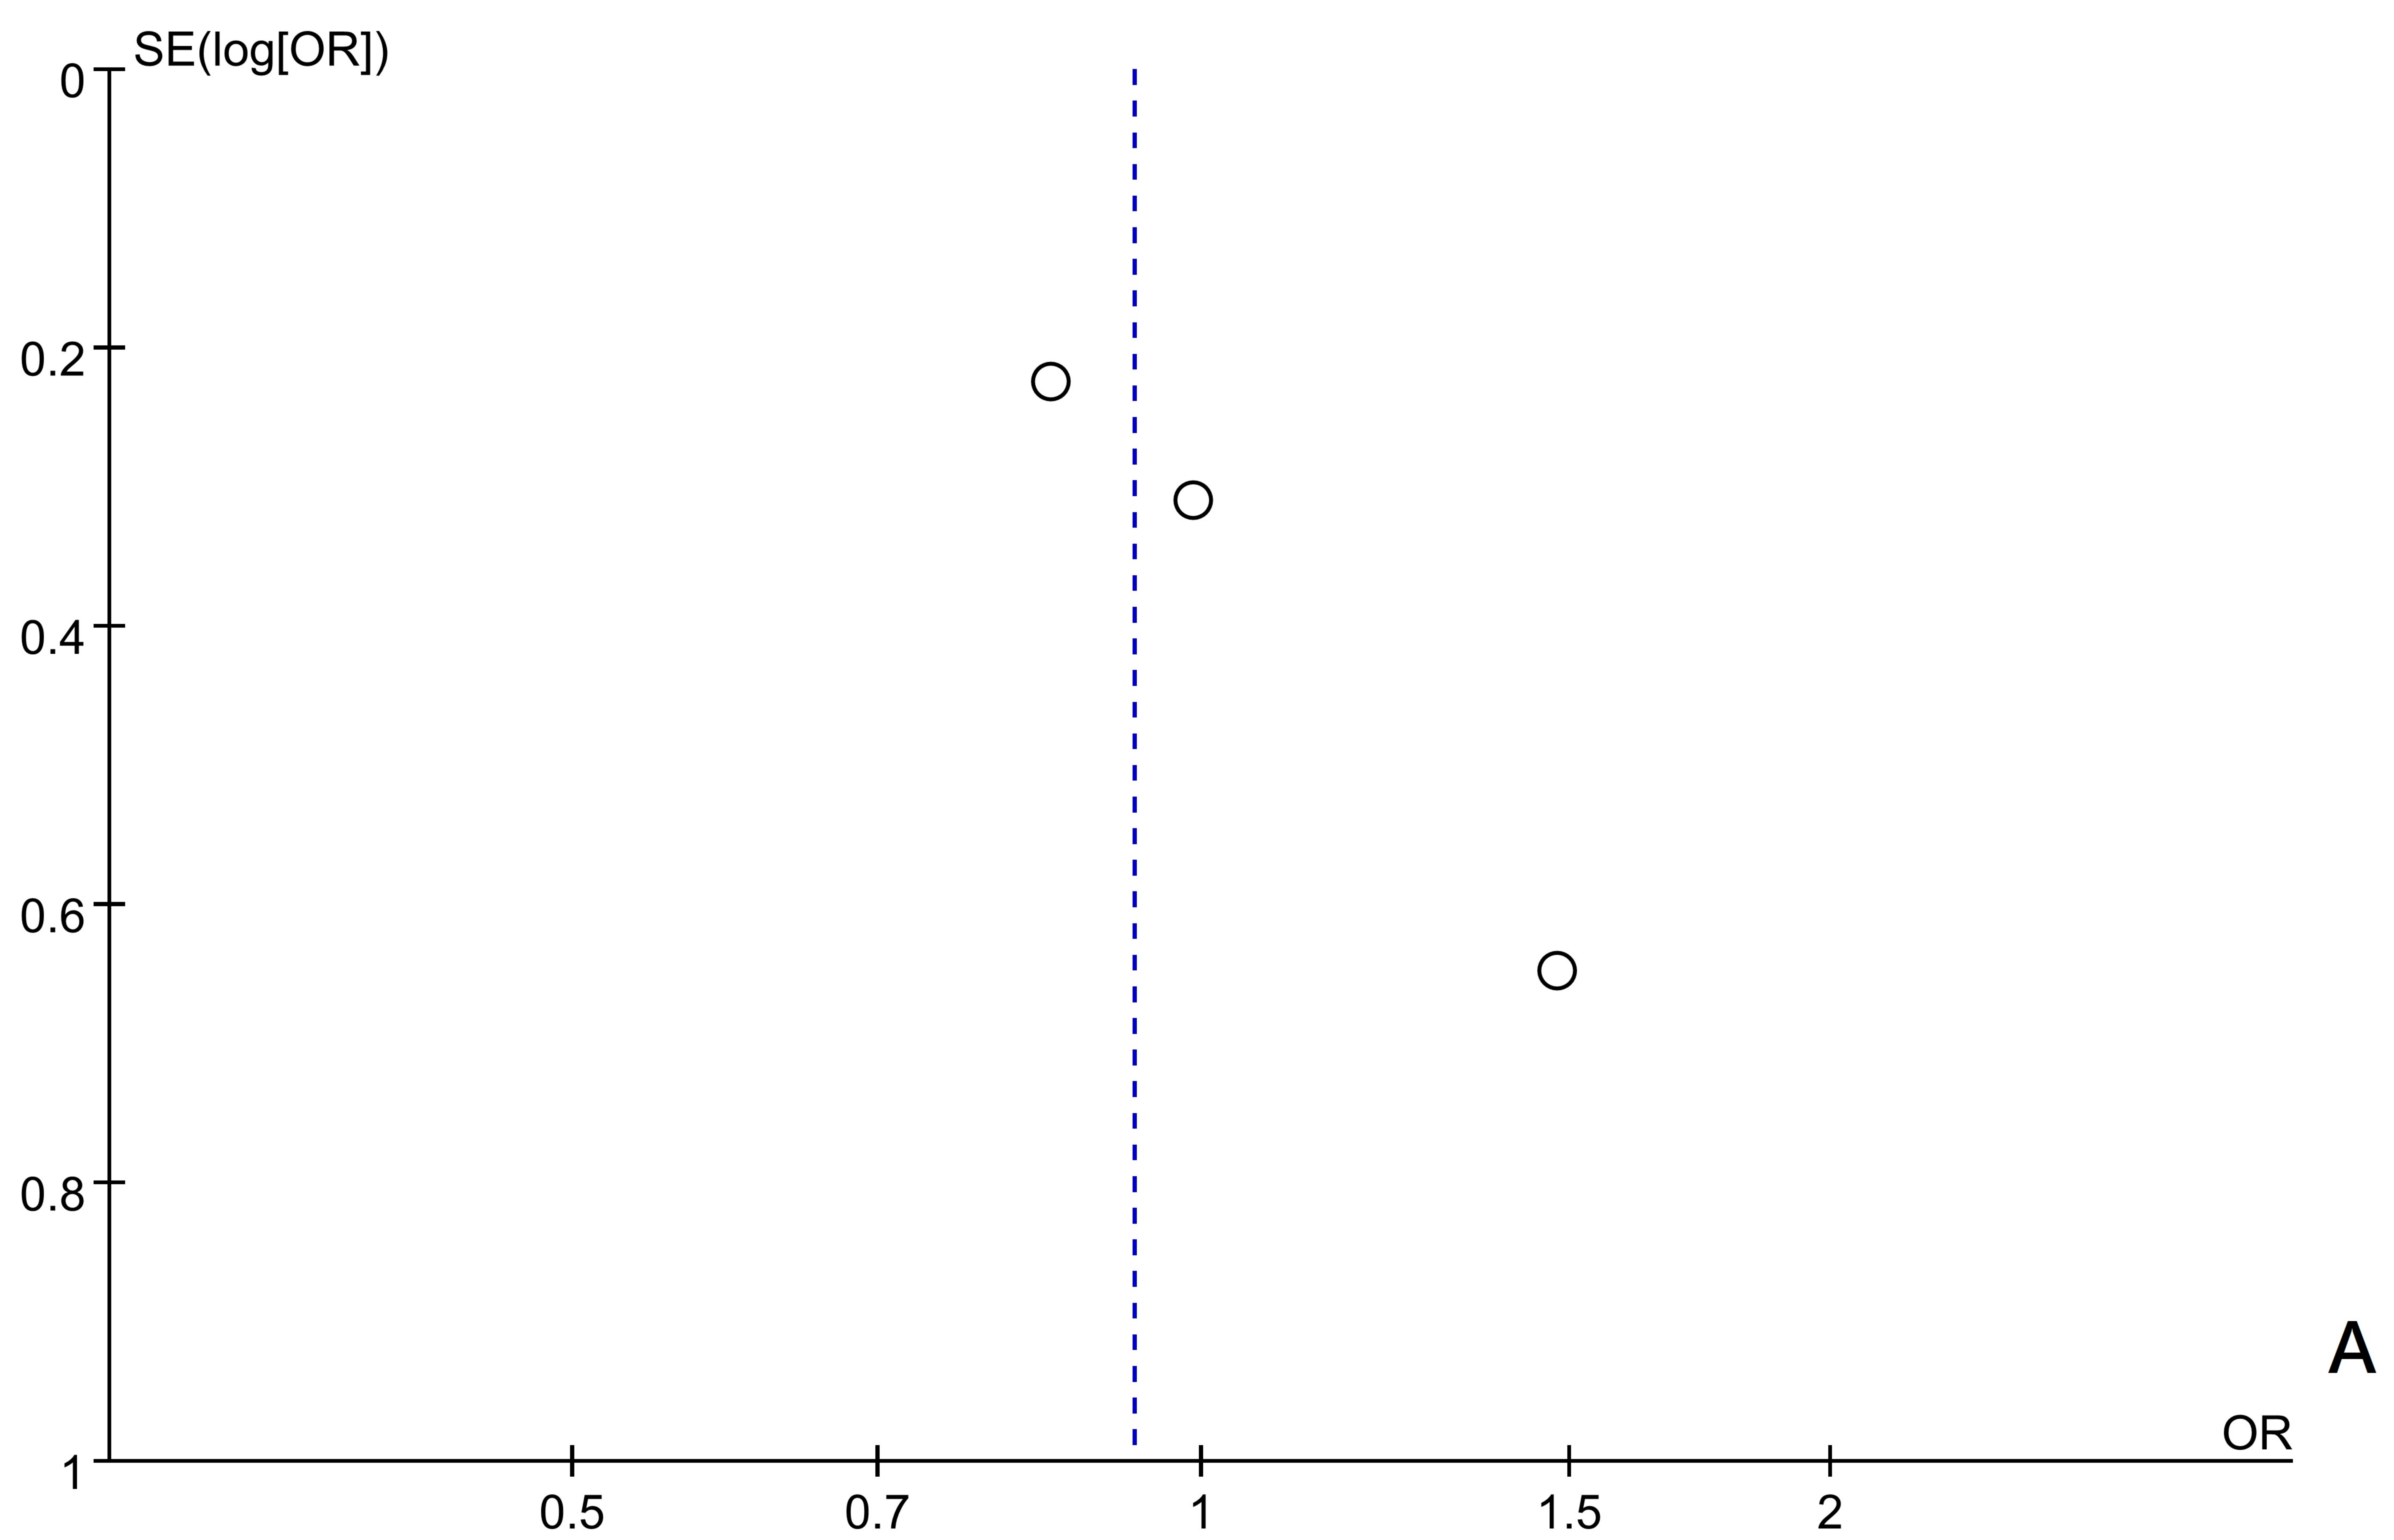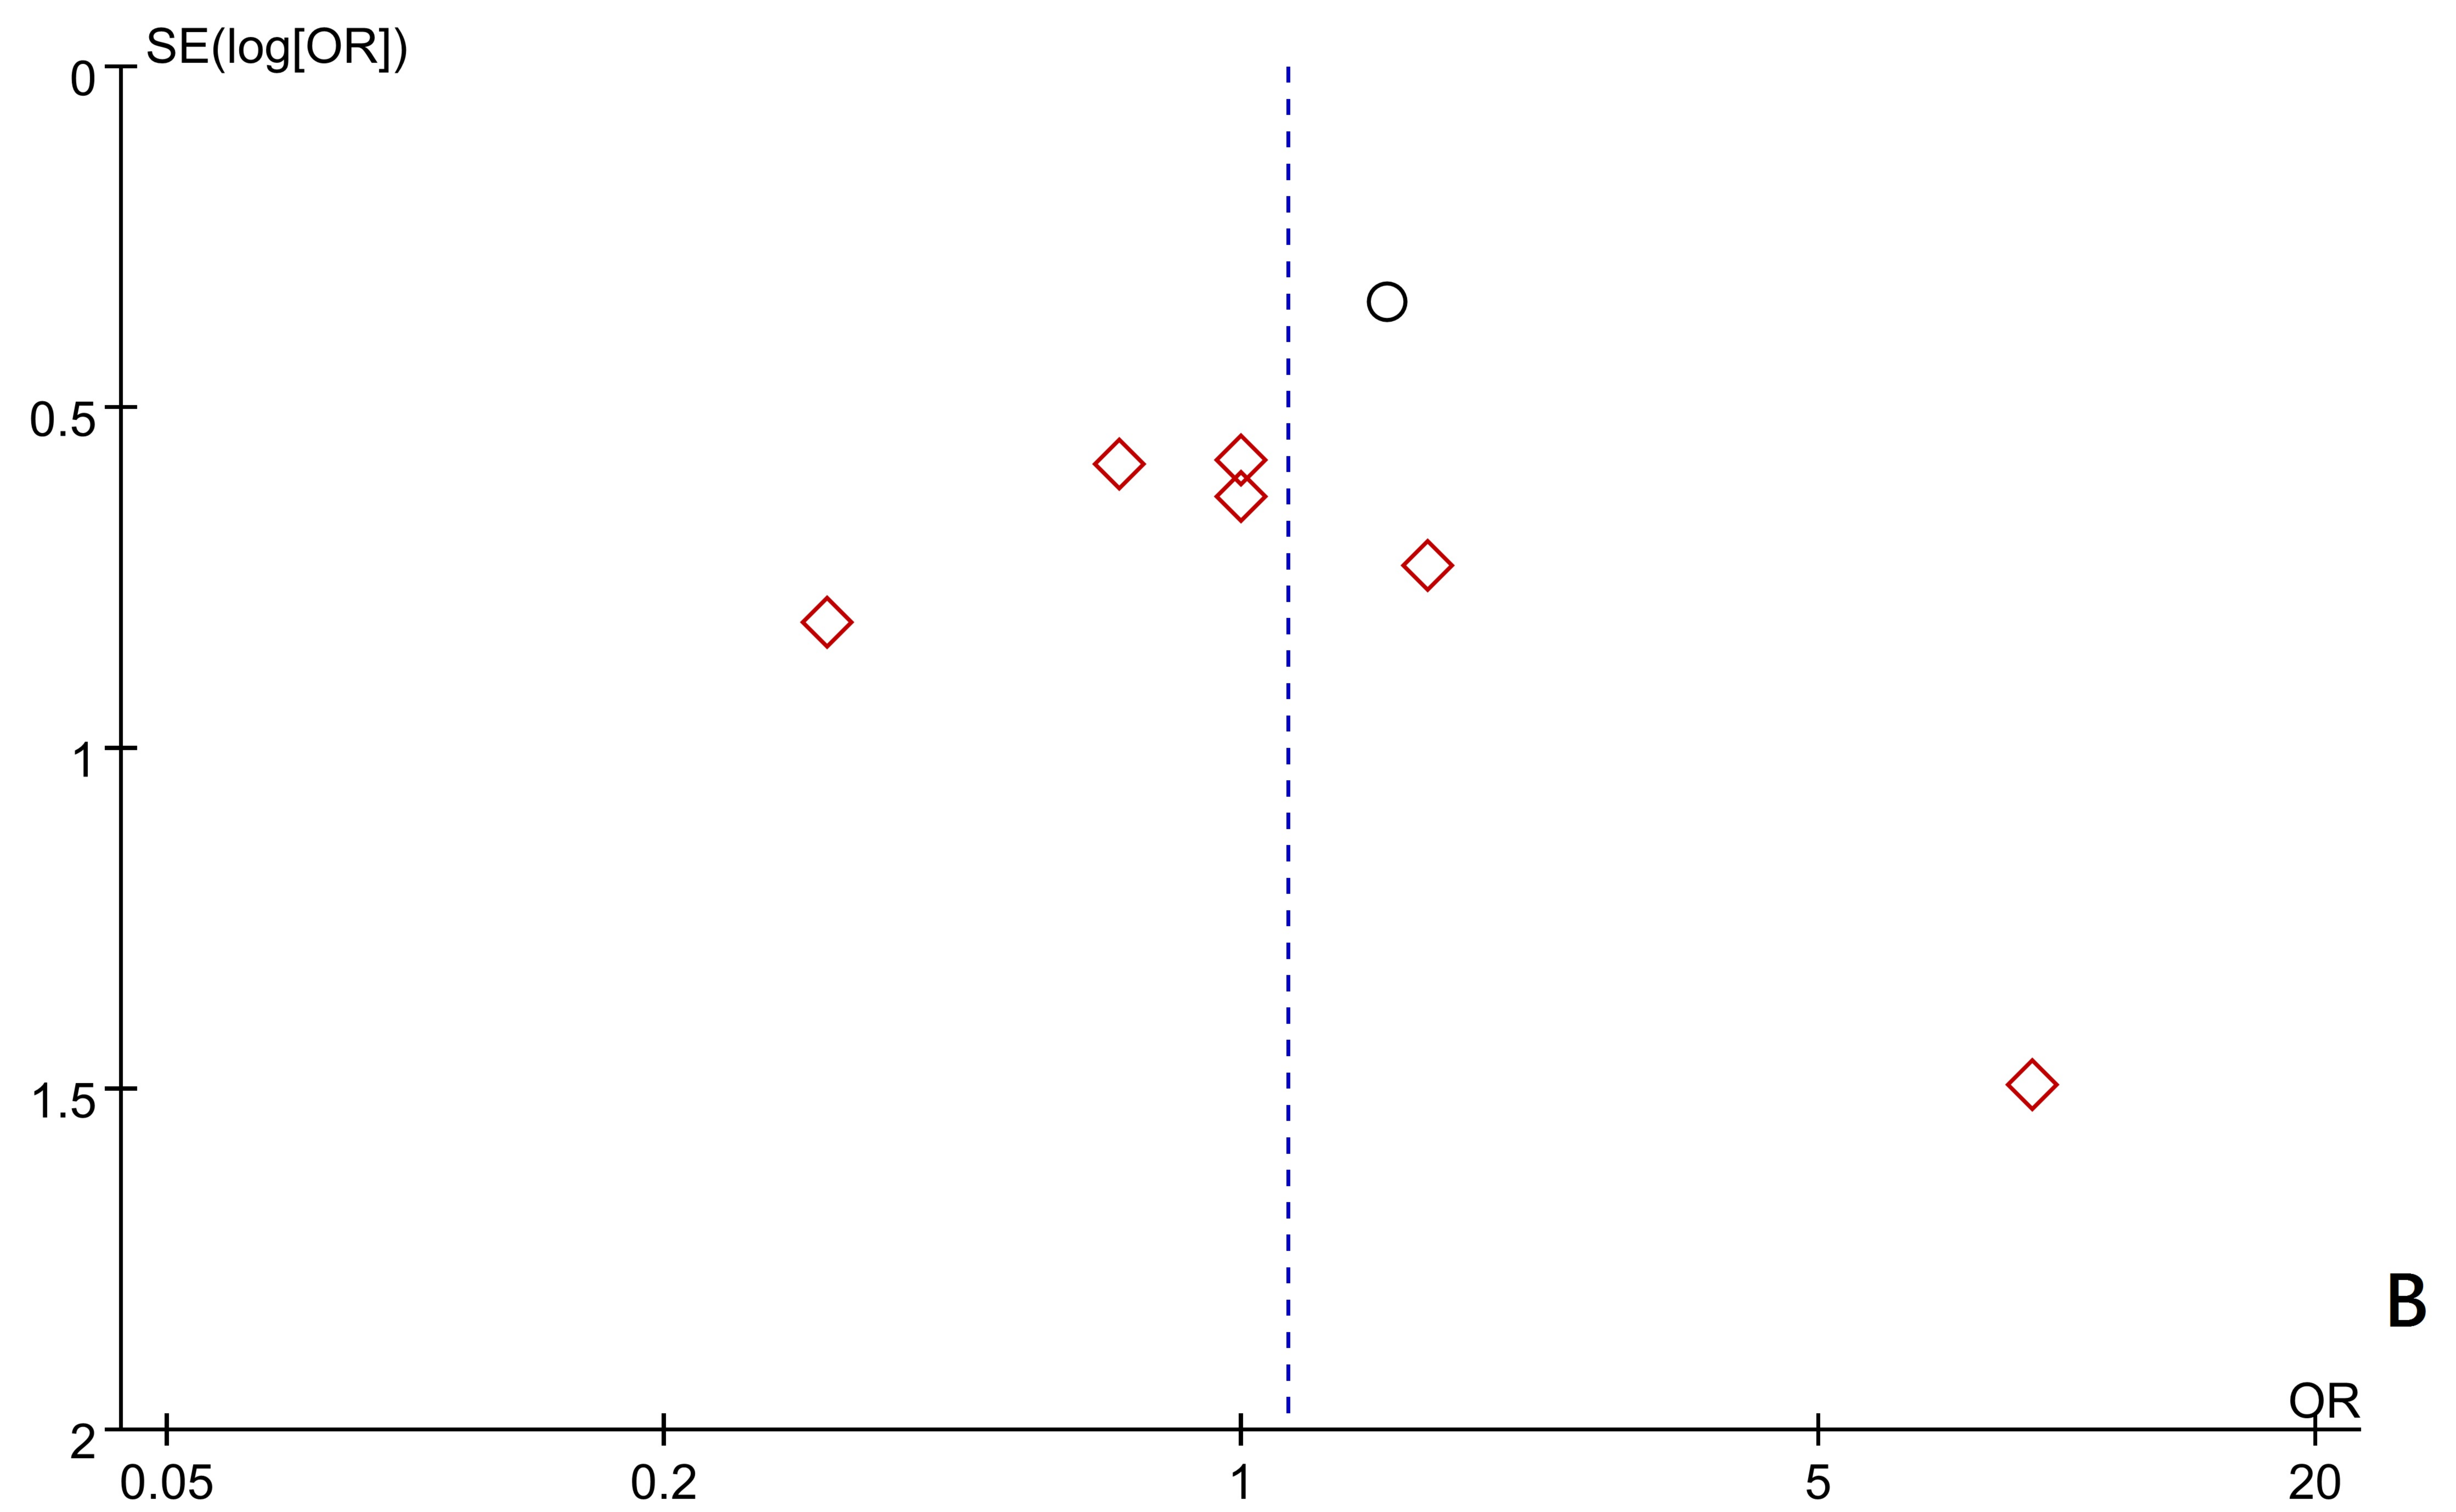

**Subgroups**

- >12 months DAPT treatment vs. <12 months DAPT treatment
- ◇ 12 months DAPT treatment vs. <12 months DAPT treatment



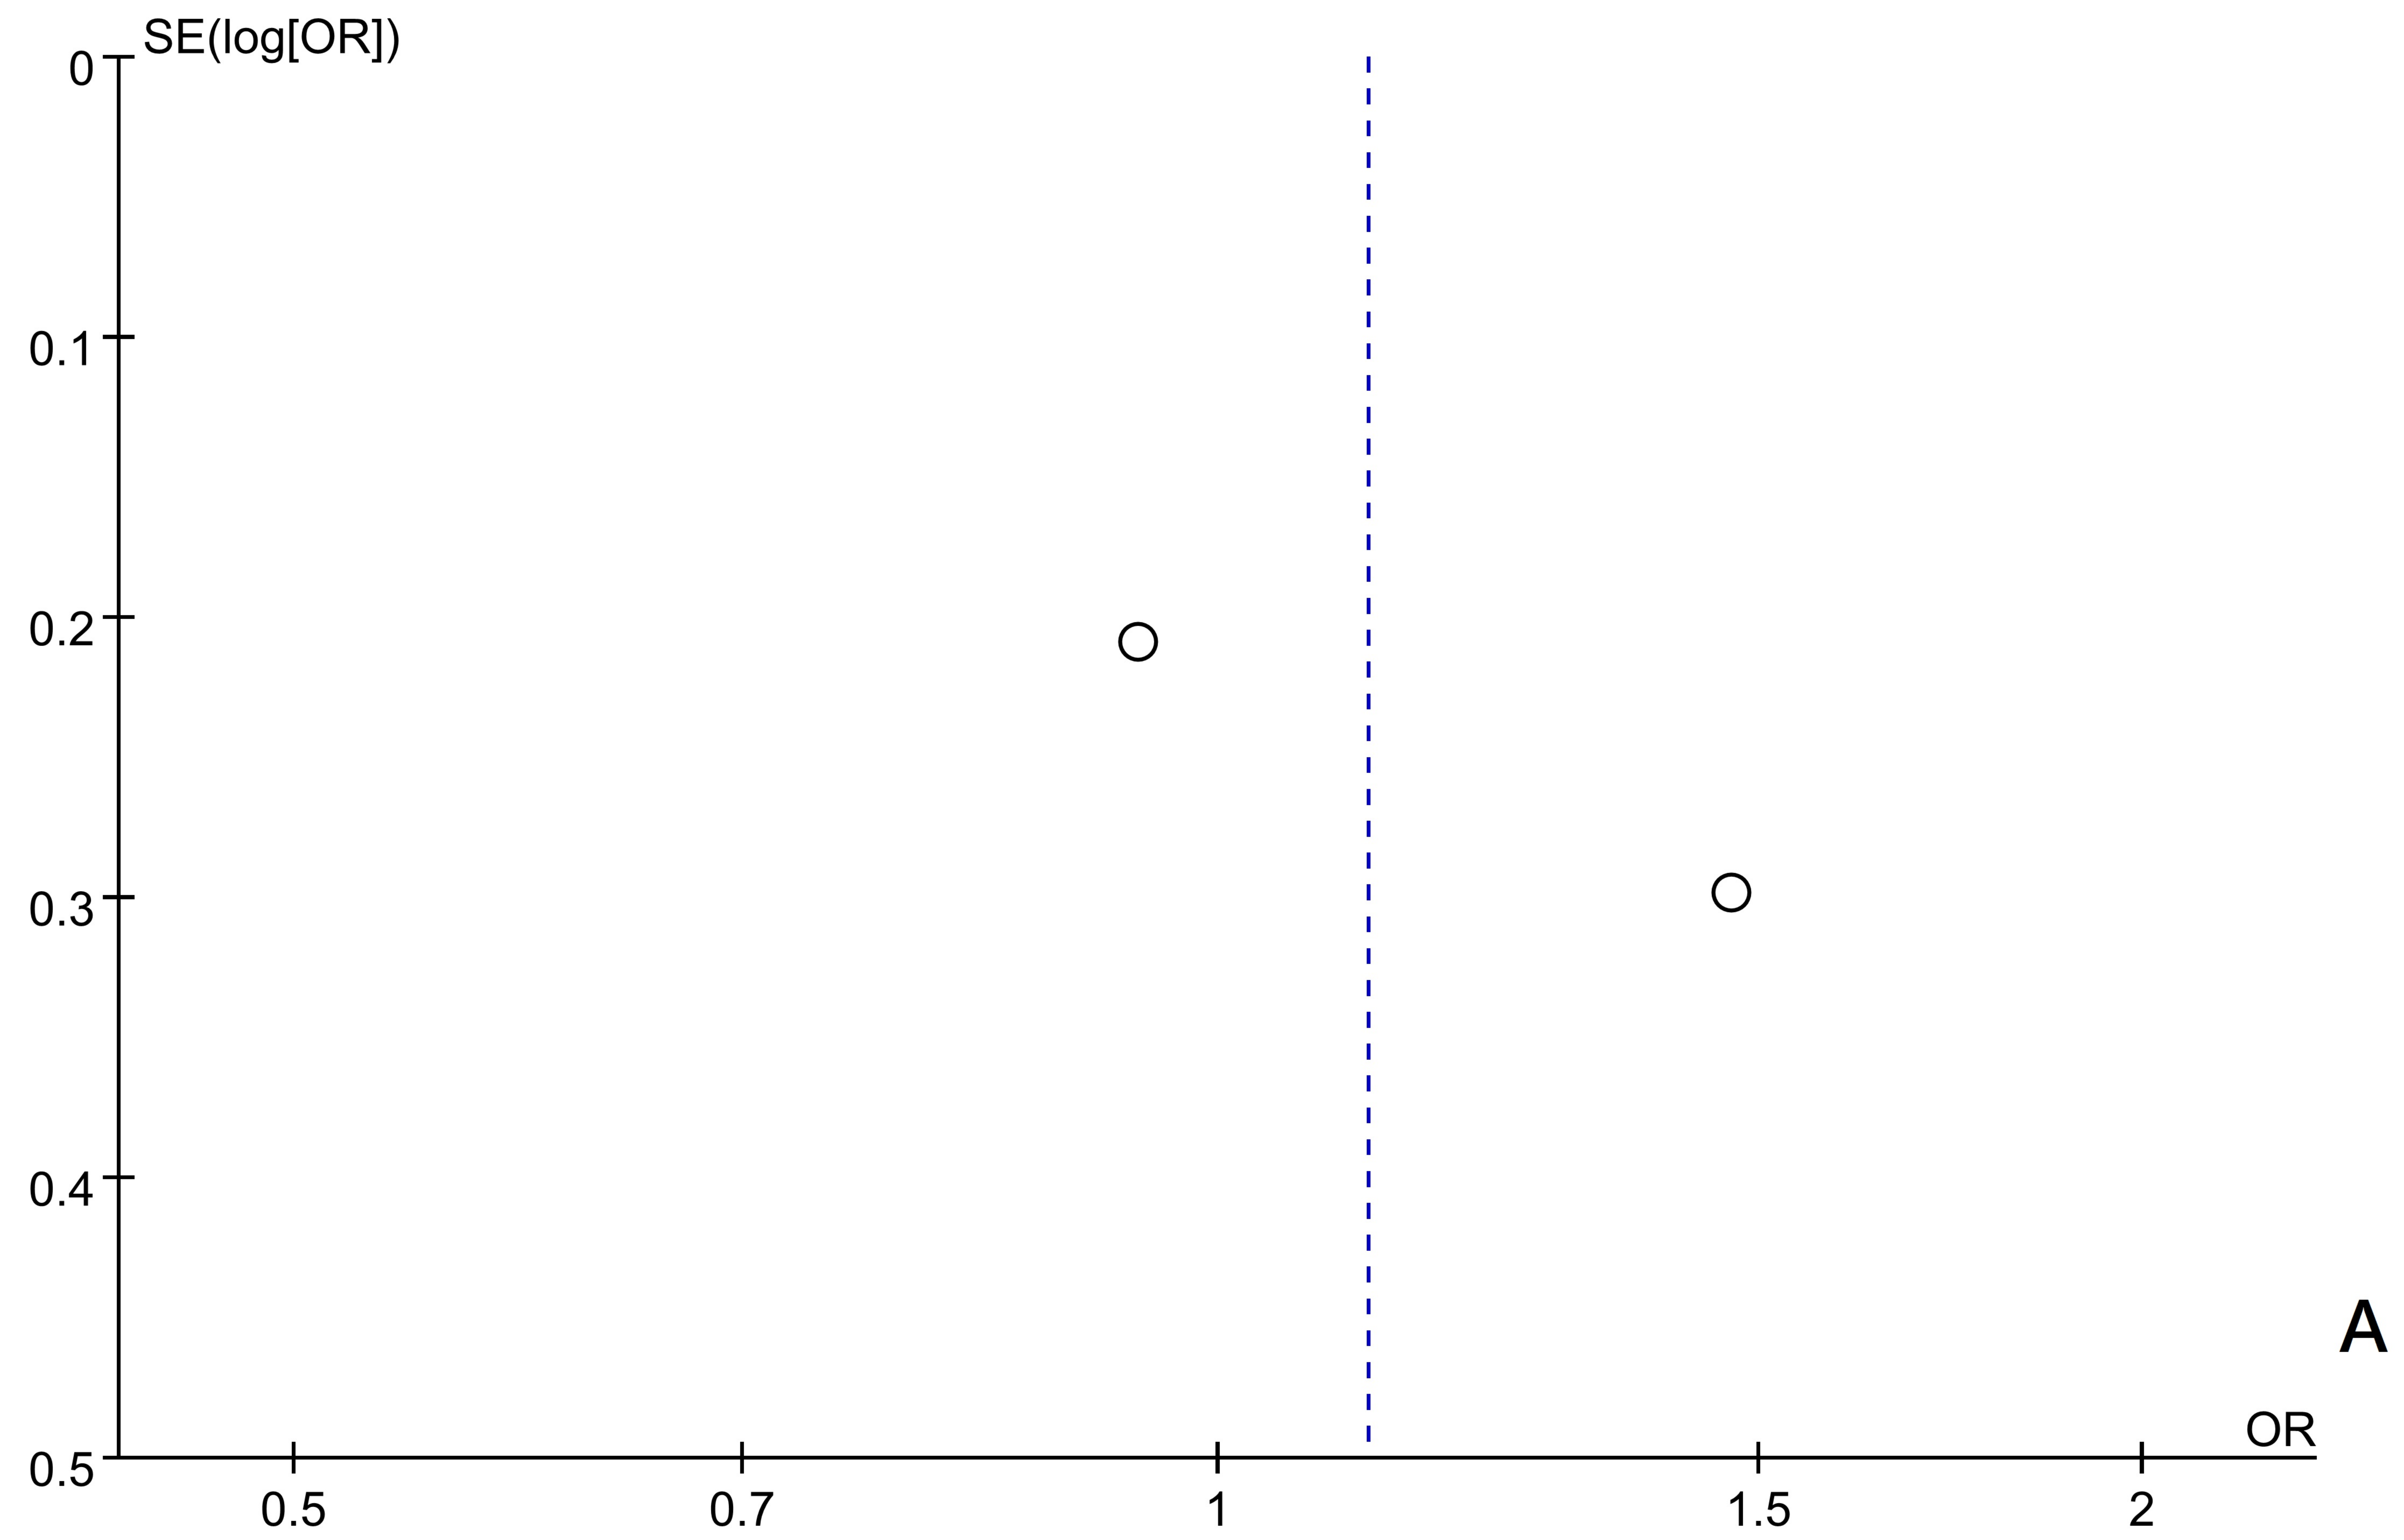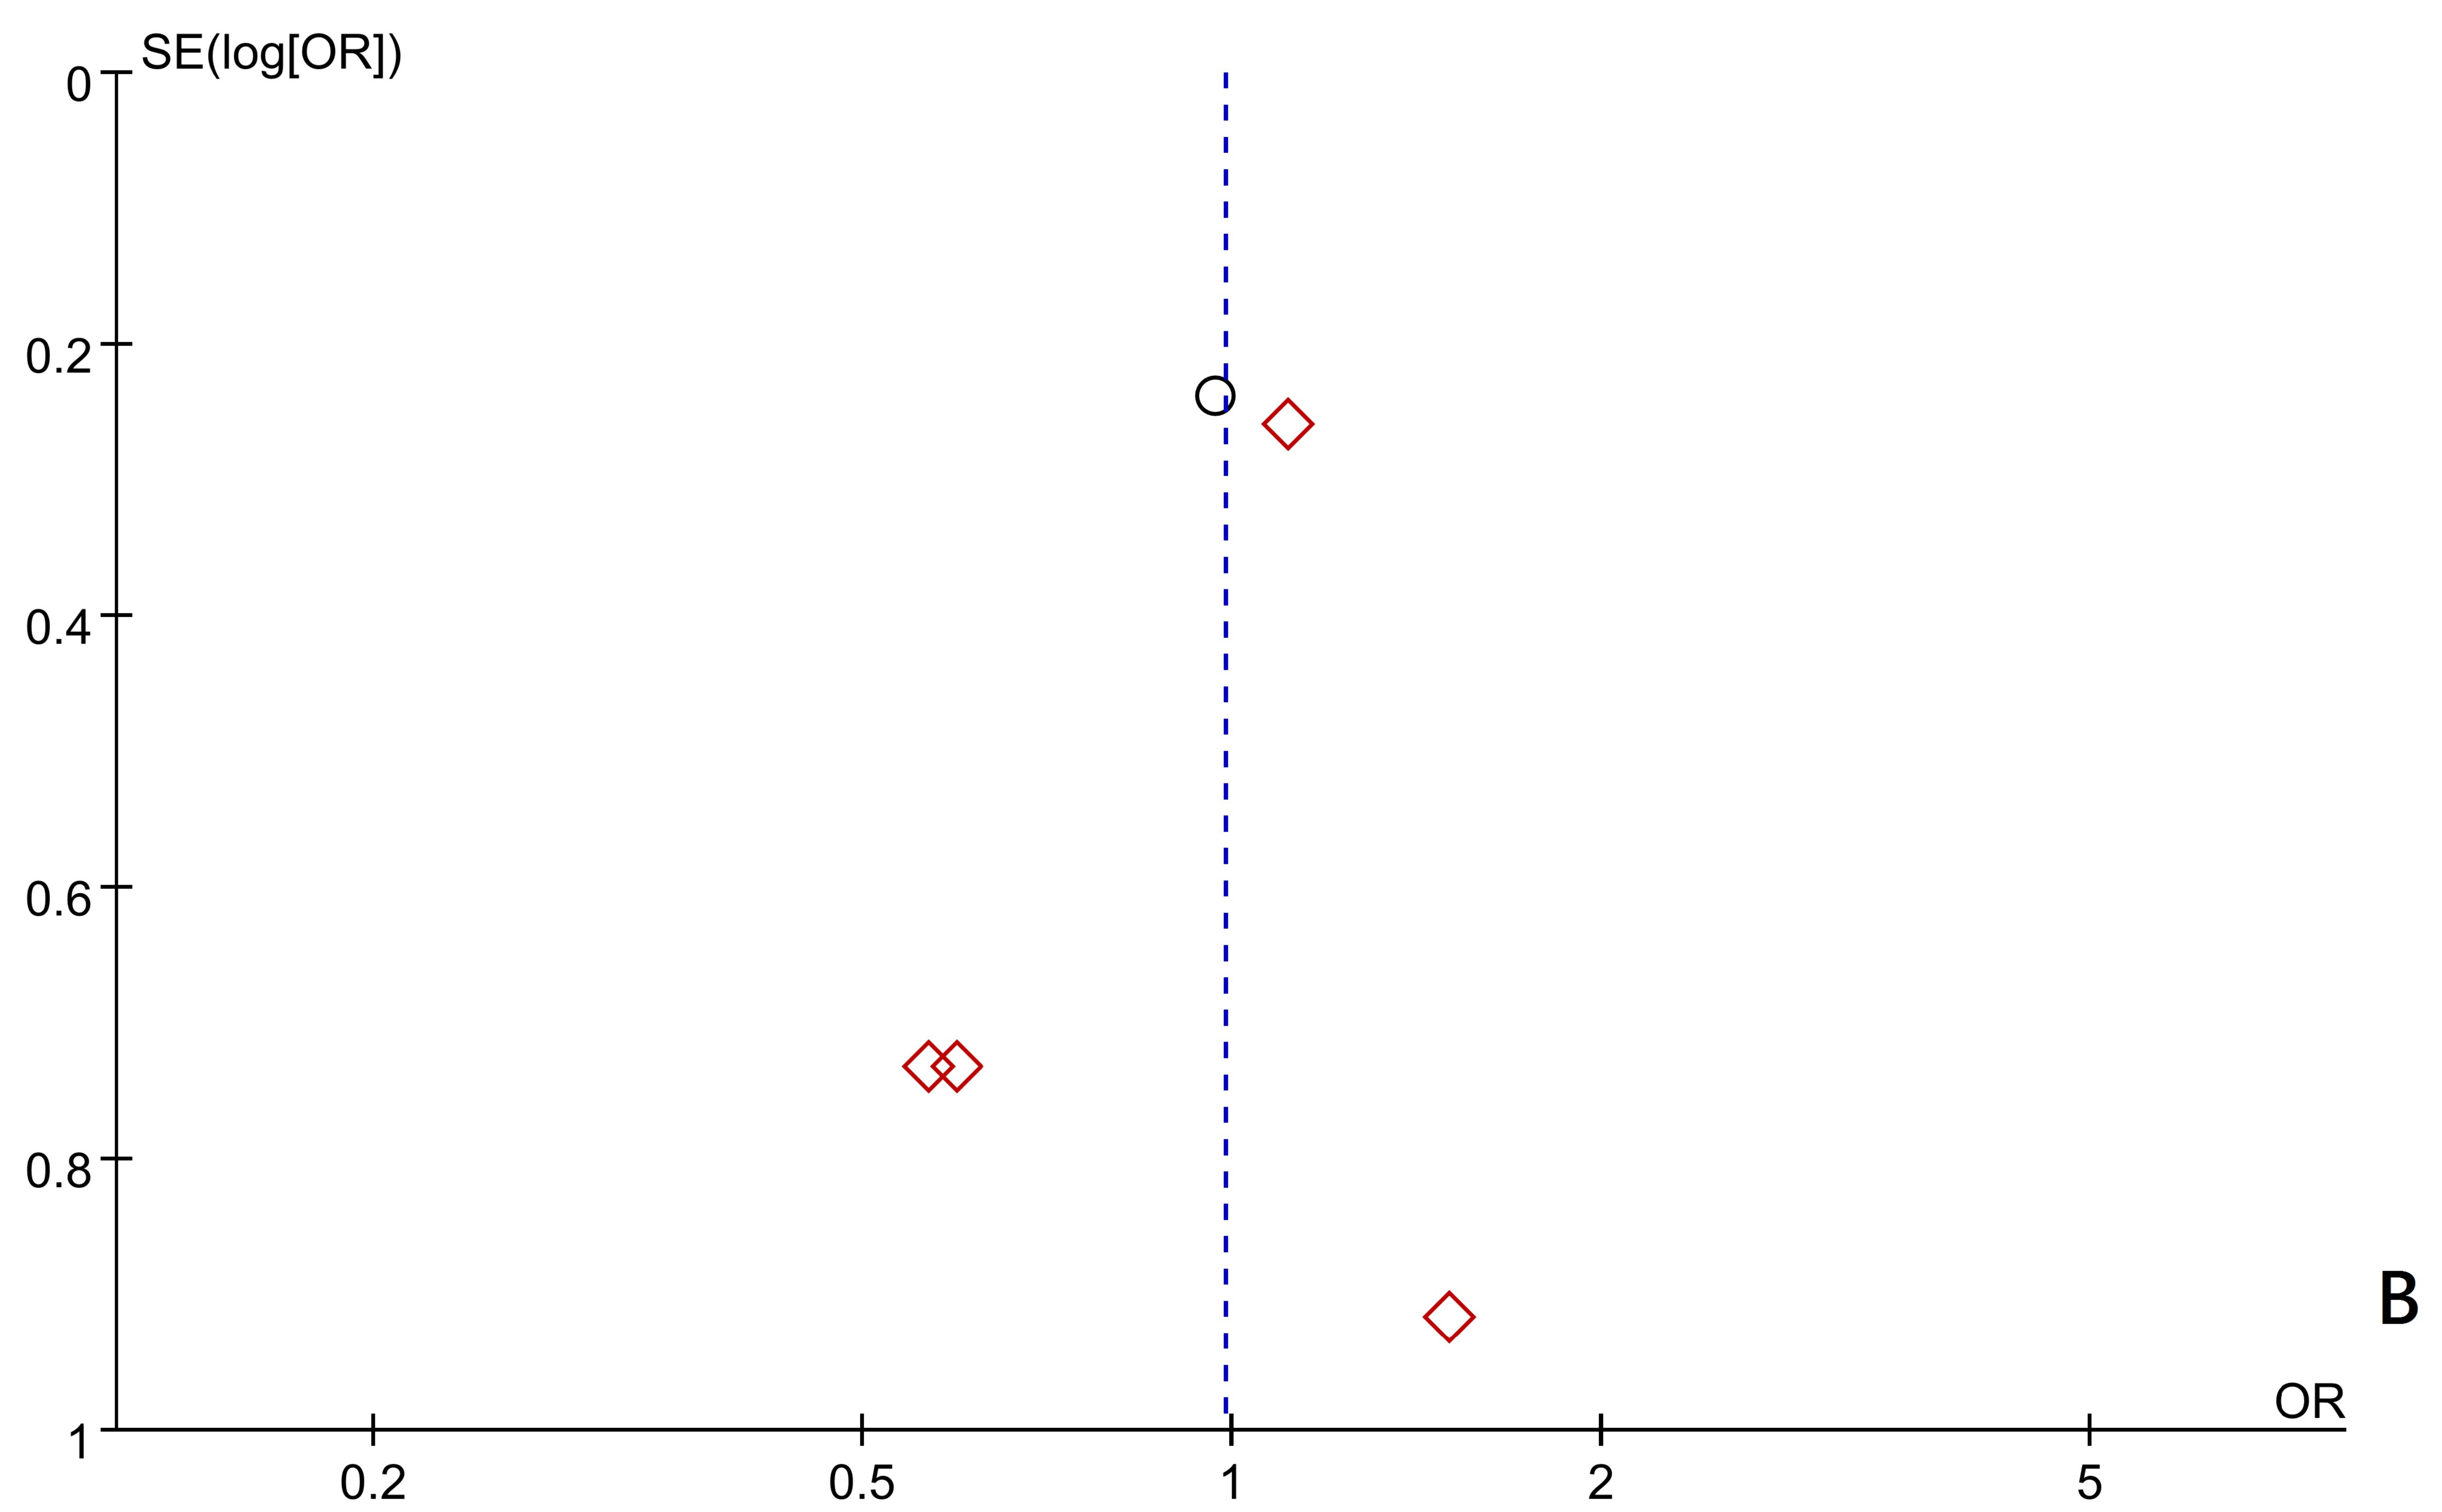

**Subgroups**

- >12 months DAPT treatment vs. <12 months DAPT treatment
- ◇ 12 months DAPT treatment vs. <12 months DAPT treatment



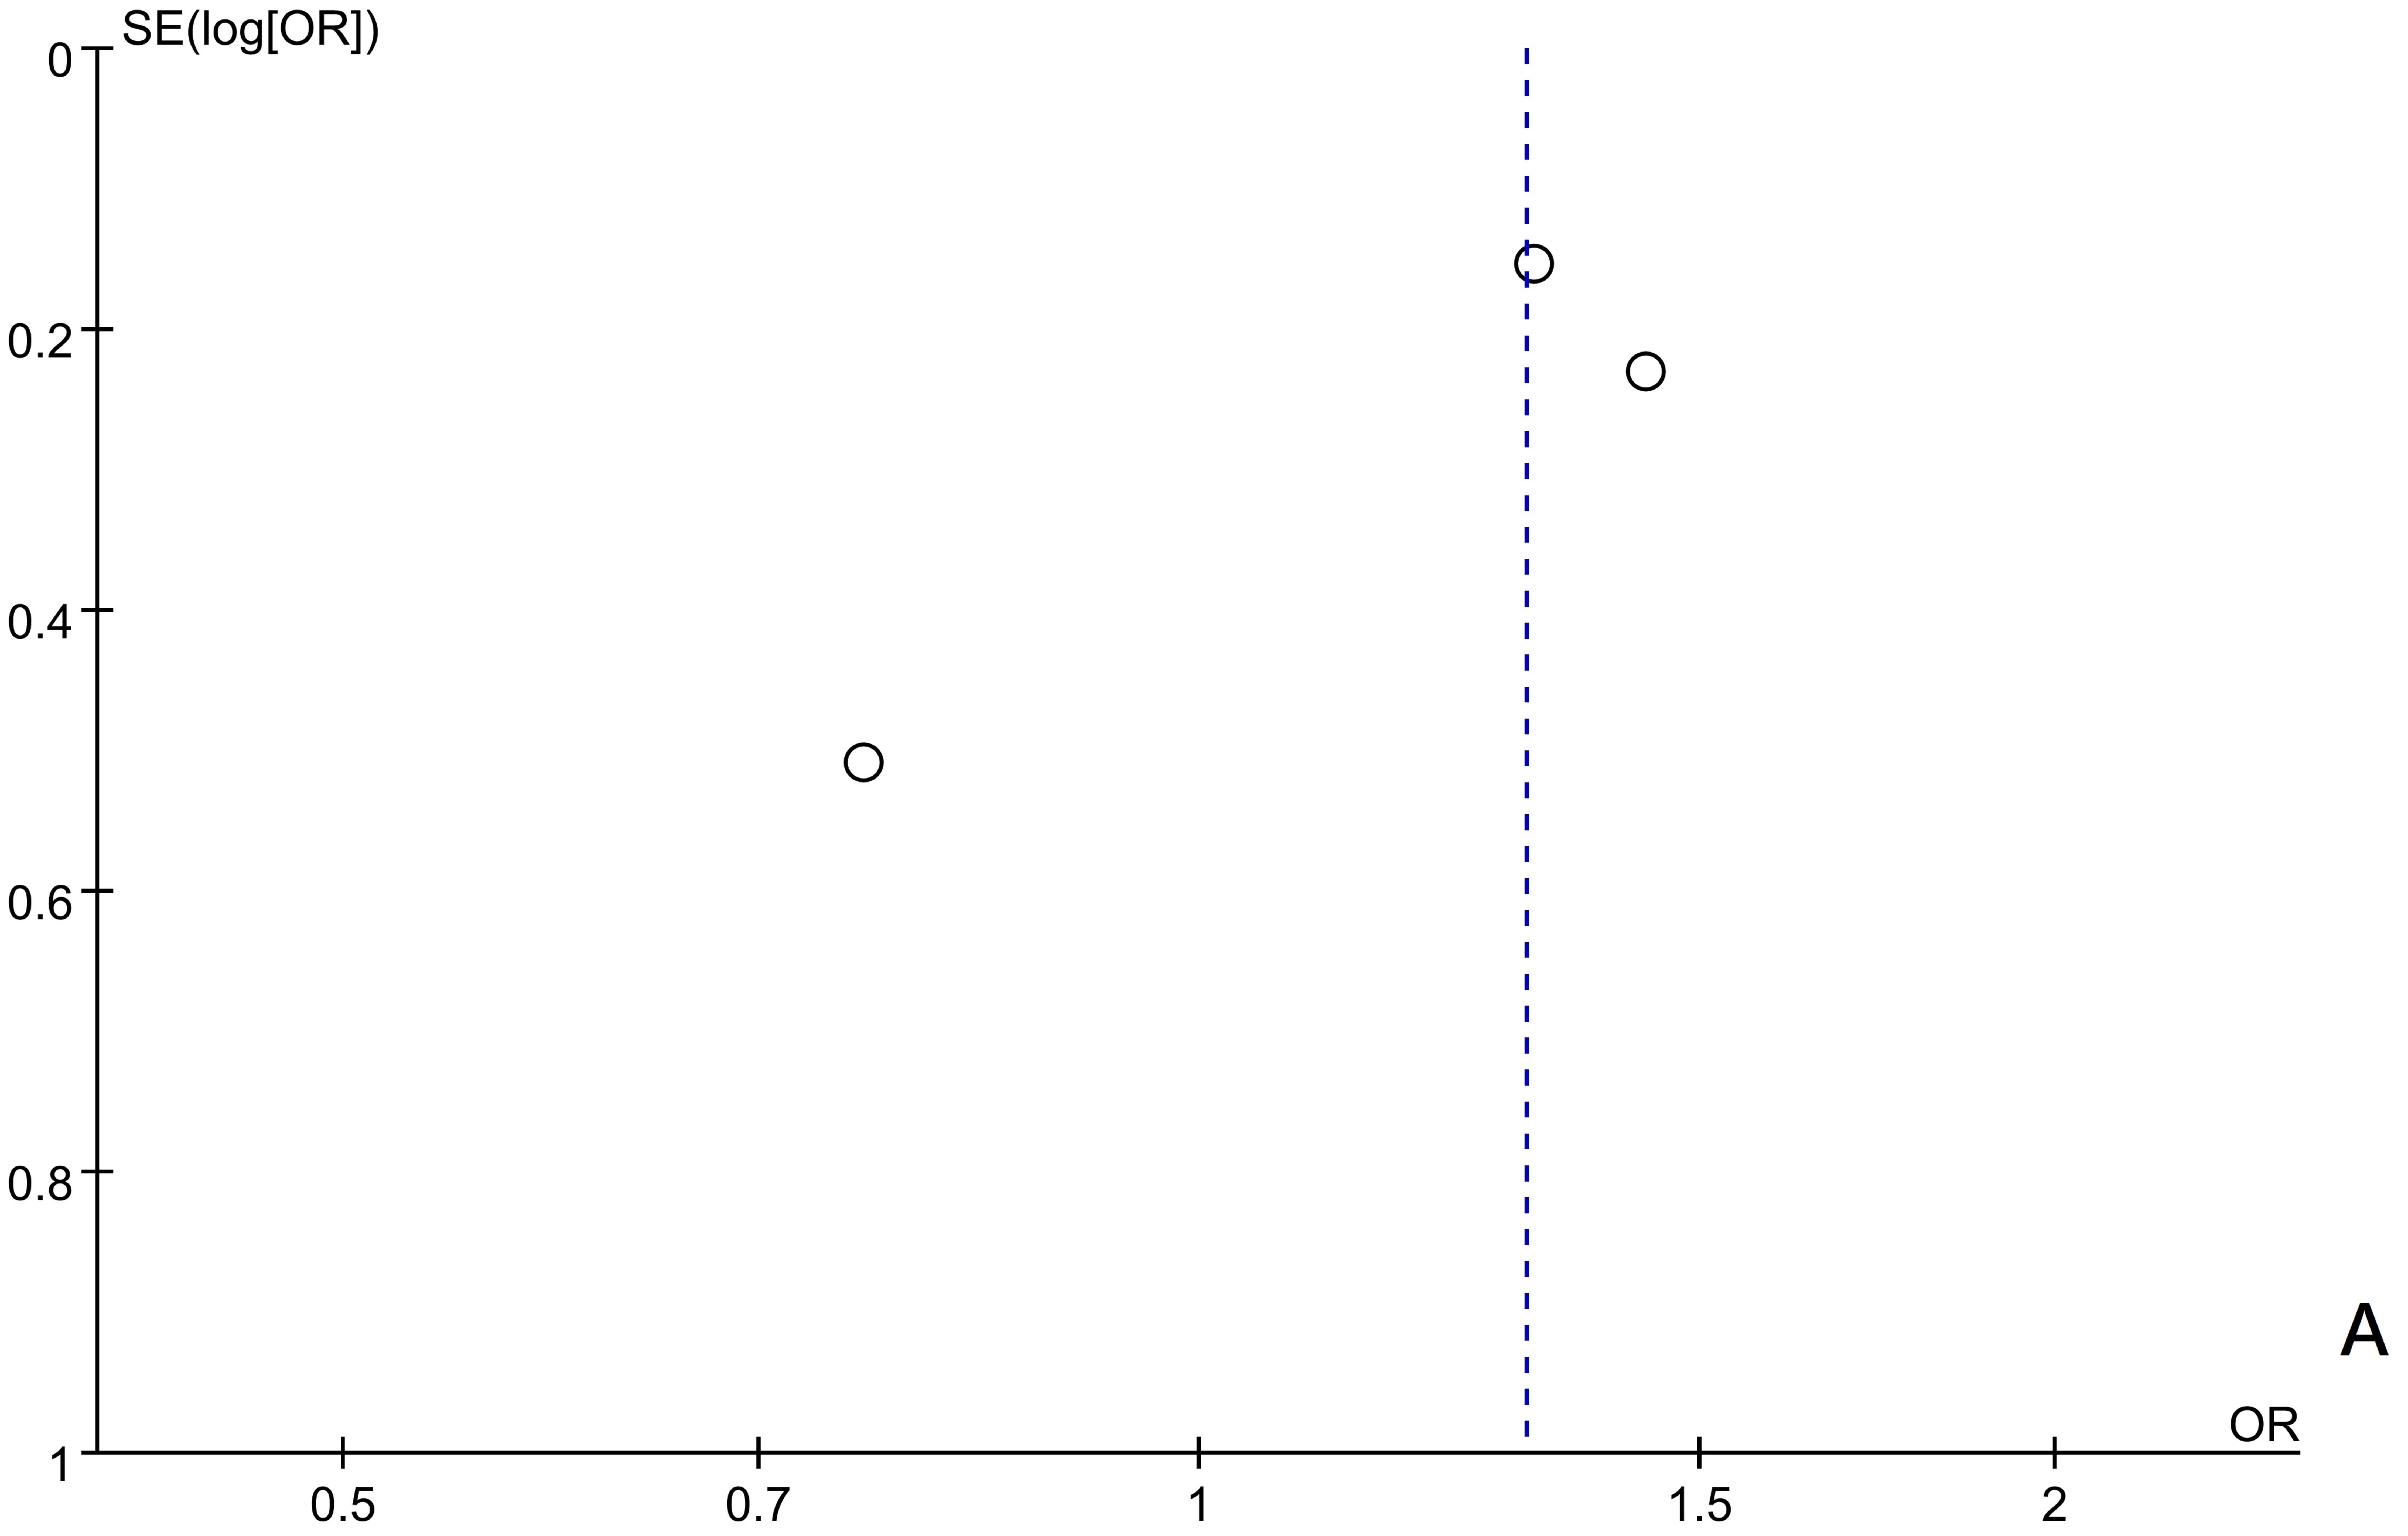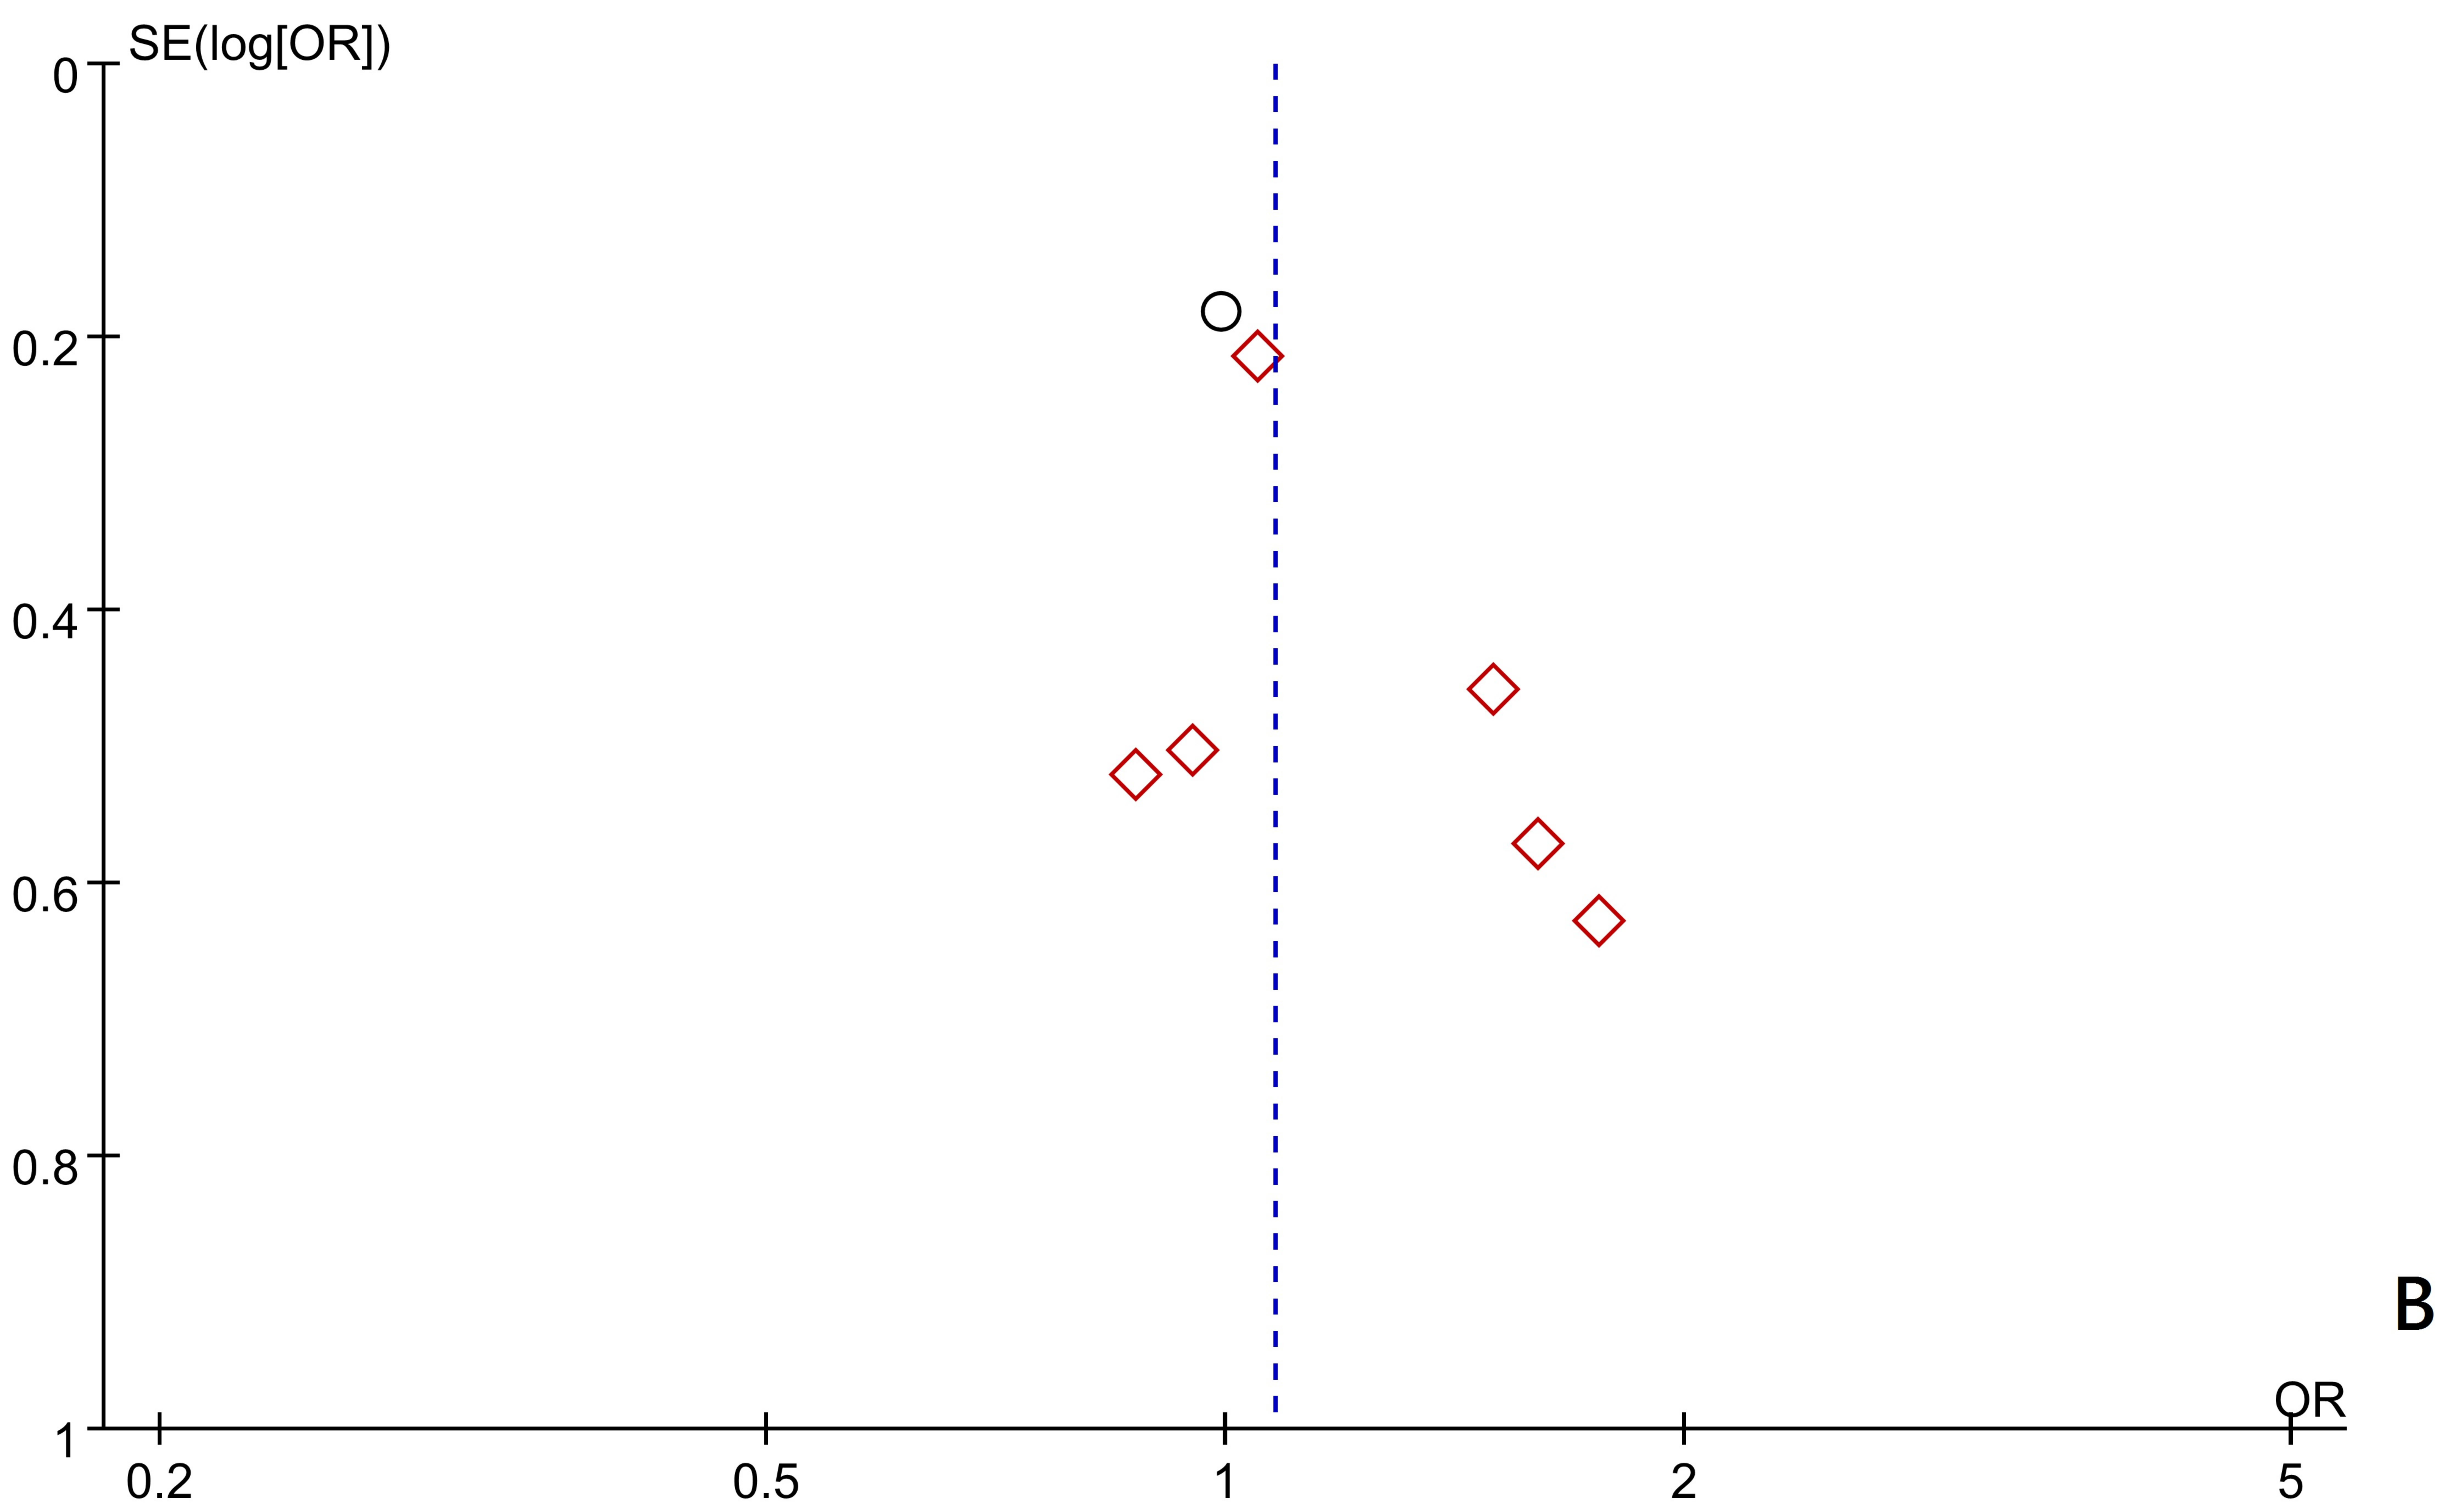

**Subgroups**

- >12 months DAPT treatment vs. <12 months DAPT treatment
- ◇ 12 months DAPT treatment vs. <12 months DAPT treatment



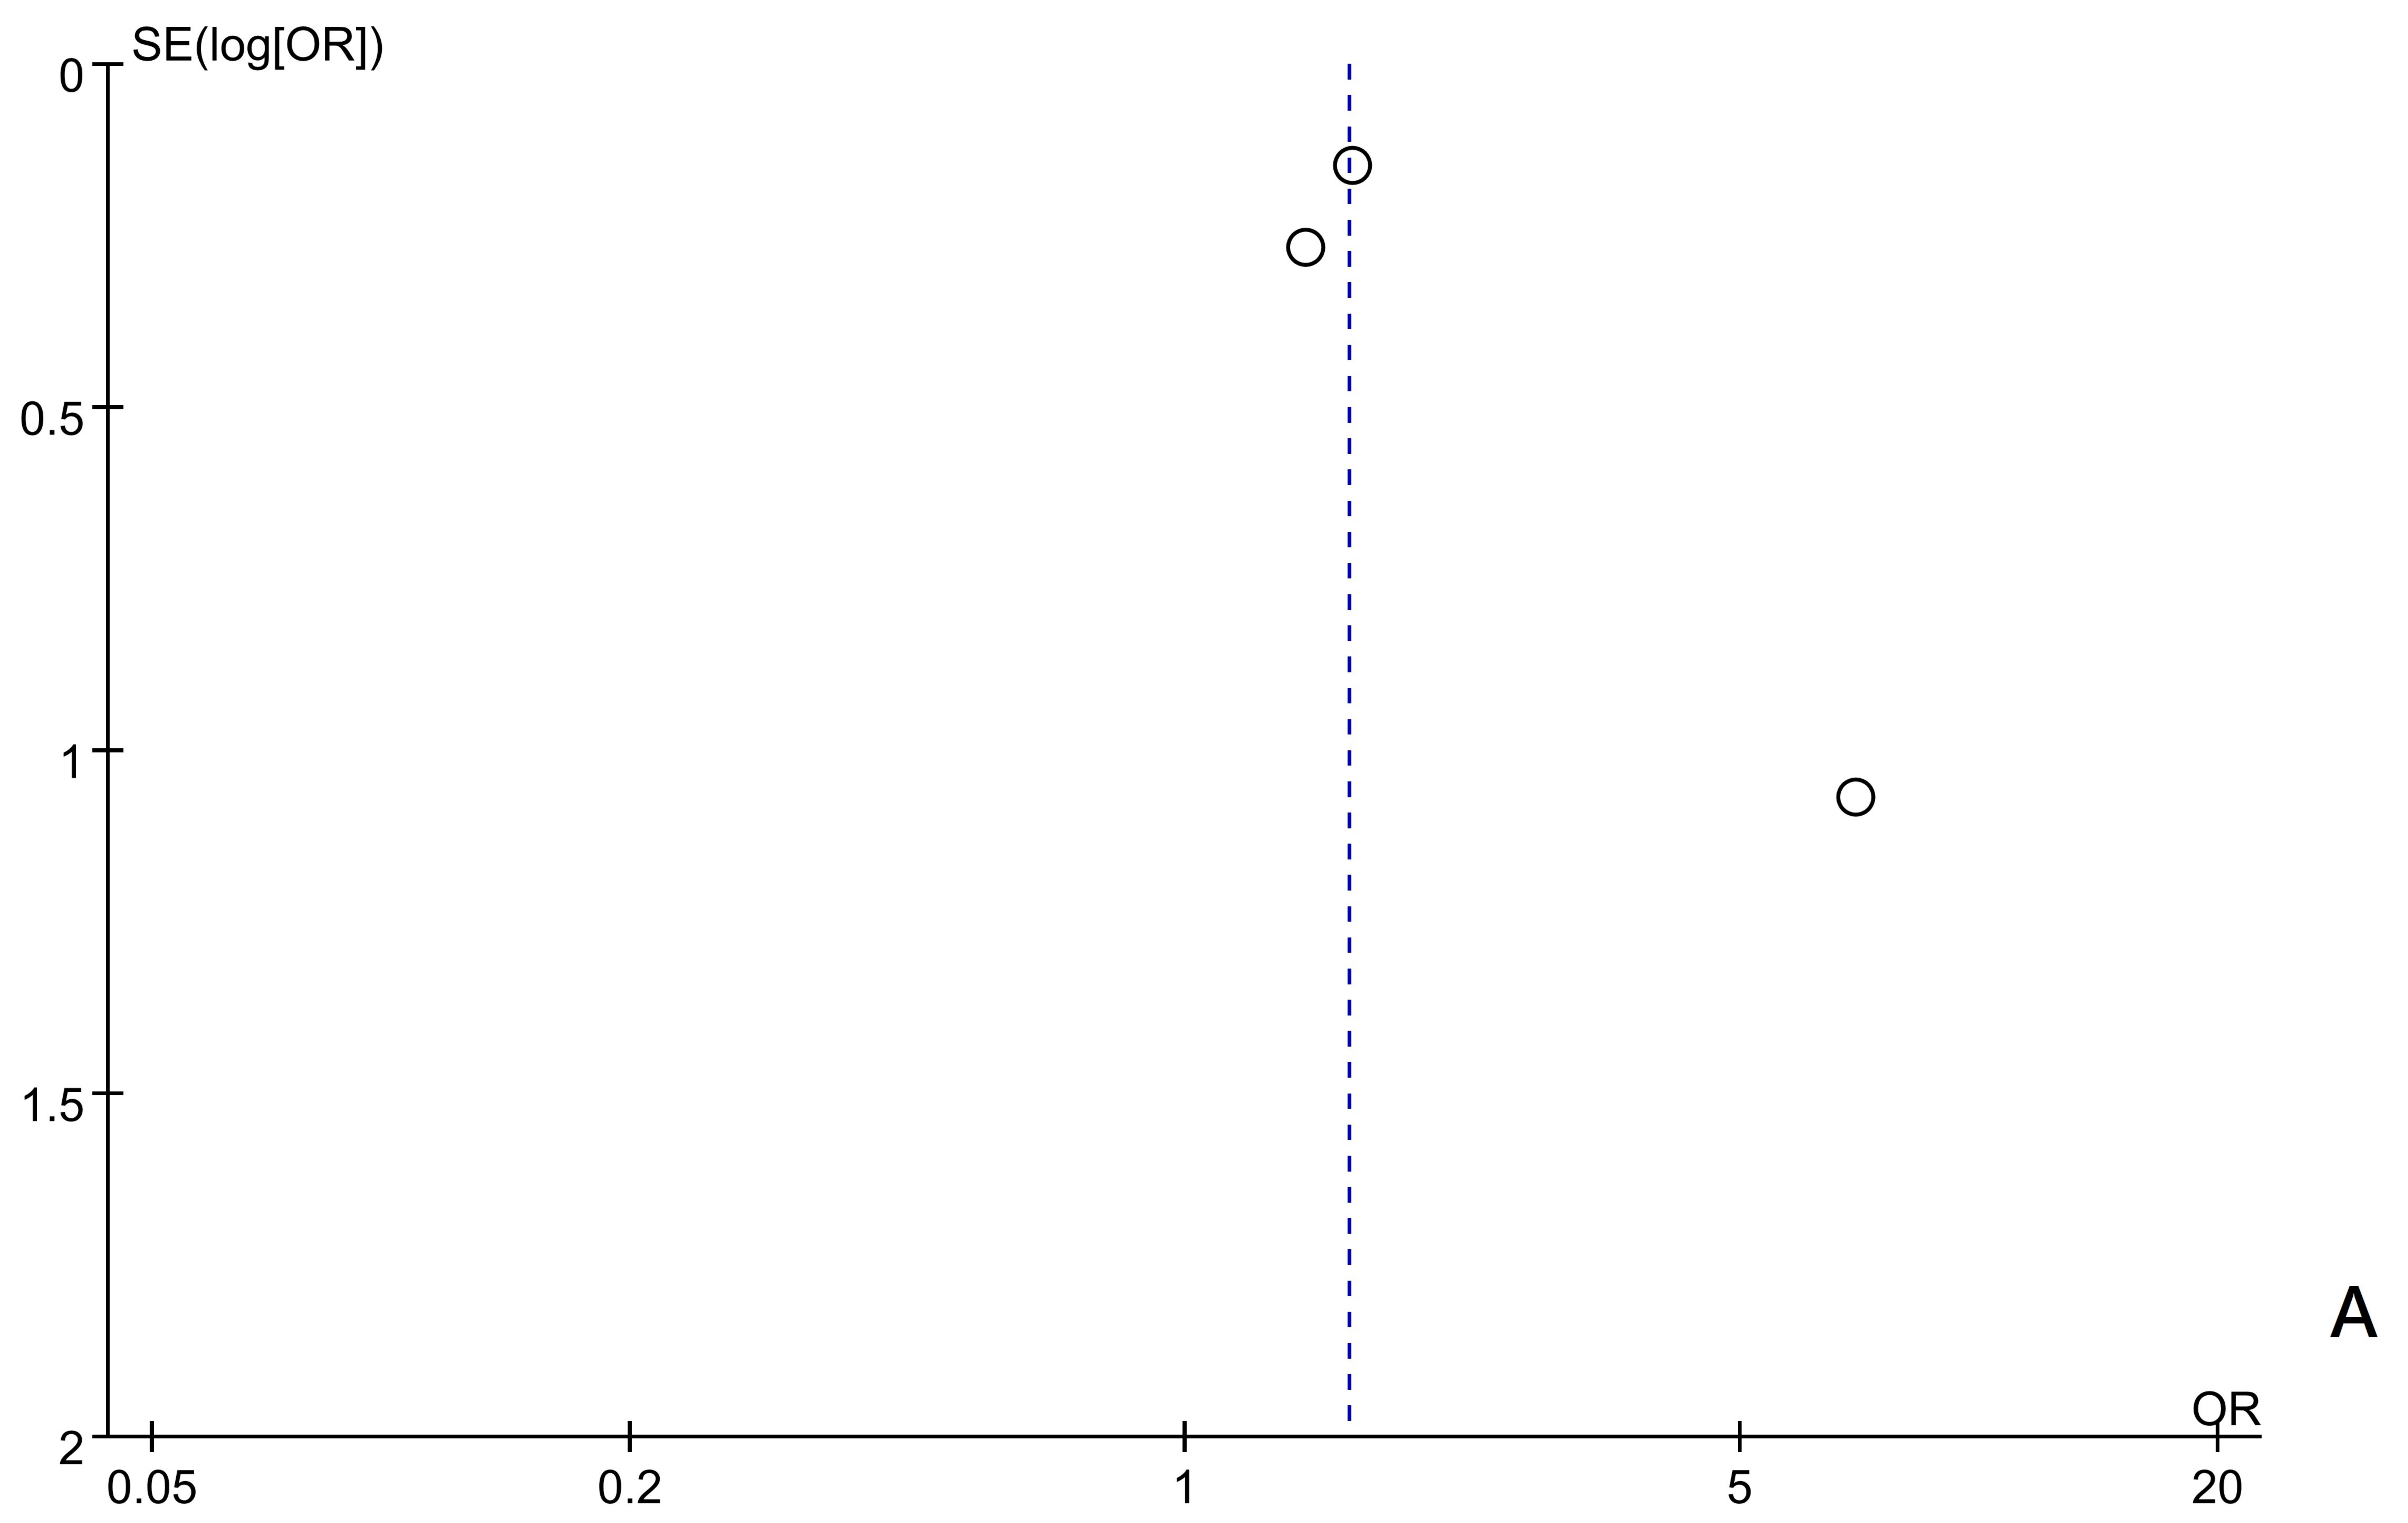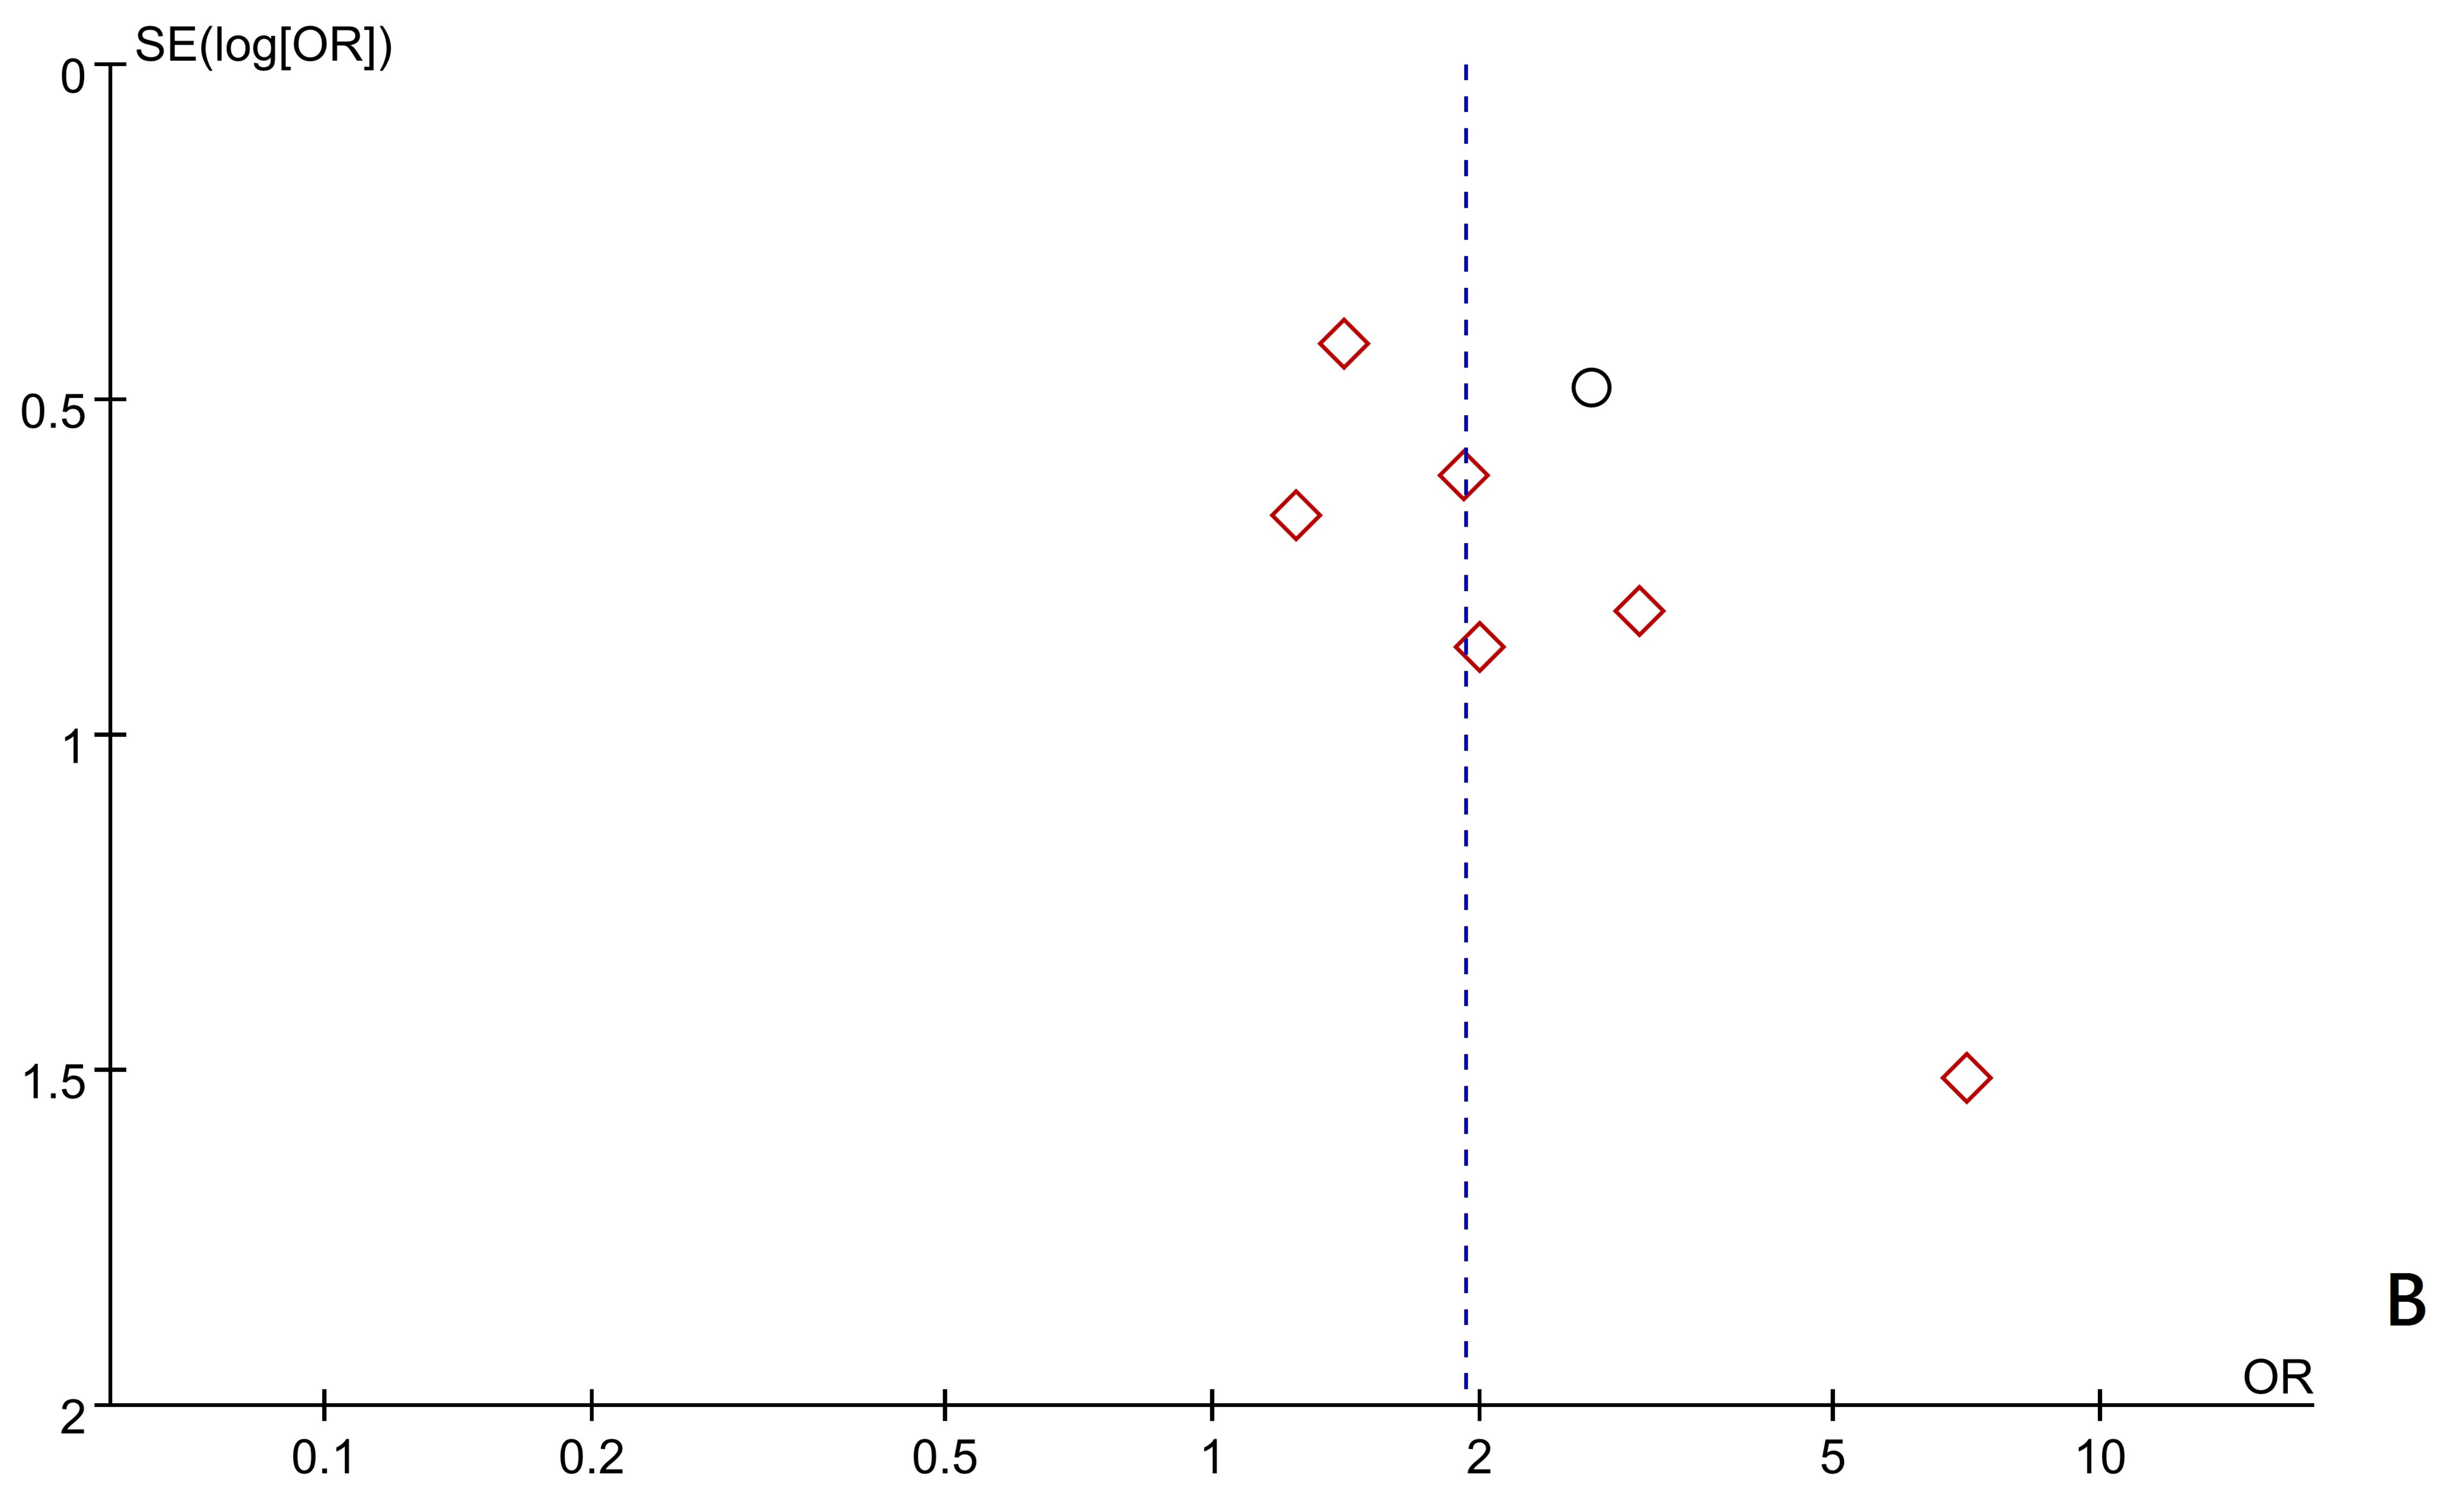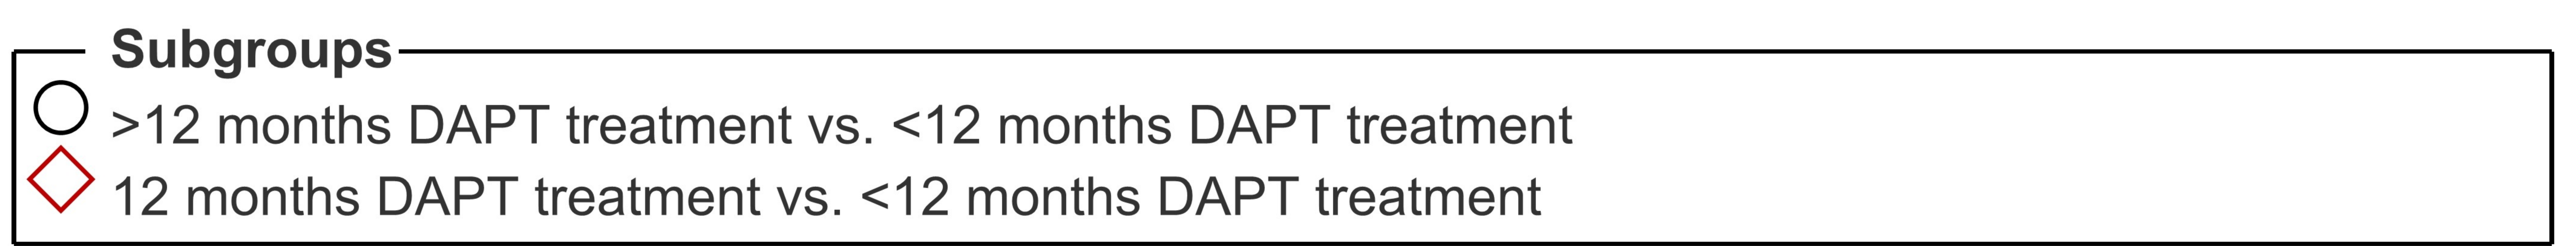

Supplement: srep13204-s1.pdf [file srep13204-s1.pdf]
